# Supplementary material for: Copper-catalyzed synthesis of arylcarboxamides from aldehydes and isocyanides: the isocyano group as an N1 synthon
Source: Royal Society of Chemistry journal article supplement (doi:10.1039/c7ob01449j), 2017-01-01

## *Supporting Information for*

# Copper-Catalyzed Synthesis of Arylcarboxamides from Aldehyde and Isocyanides: Isocyano Group as an N1 Synthon

Jian-Quan Liu<sup>+, a\*</sup>, Xuanyu Shen<sup>+, a</sup>, Lanlan Lv,<sup>a</sup> Zhenhua Liu,<sup>b</sup> Xiang-Shan Wang<sup>a\*</sup>

<sup>a</sup> School of Chemistry and Chemical Engineering, Jiangsu Key Laboratory of Green Synthesis for Functional Materials, Jiangsu Normal University, Xuzhou Jiangsu 221116, P. R. China.

<sup>b</sup> College of Chemistry, Chemical Engineering and Materials Science, Shandong Normal University, Jinan 250014, P. R. China.

E-mail: [liujq316@jsnu.edu.cn](mailto:liujq316@jsnu.edu.cn) and [xswang1974@yahoo.com](mailto:xswang1974@yahoo.com)

## **Content**

|                                                             |   |
|-------------------------------------------------------------|---|
| I. General information.....                                 | 2 |
| II. Synthesis and analytical data of compounds 3 and 4..... | 2 |
| III. NMR spectra copies.....                                | 9 |

## I. General information

All reagents were purchased from commercial sources and used without treatment, unless otherwise indicated. The products were purified by column chromatography over silica gel.  $^1\text{H-NMR}$  and  $^{13}\text{C-NMR}$  spectra were recorded at 25 °C on a Varian 400 MHz and 100 MHz, respectively, and TMS was used as internal standard. Mass spectra were recorded on BRUKER AutoflexIII Smartbeam MS-spectrometer. High resolution mass spectra (HRMS) were recorded on Bruker microTof by using ESI method.

## II. Synthesis and analytical data of compounds 3 and 4.

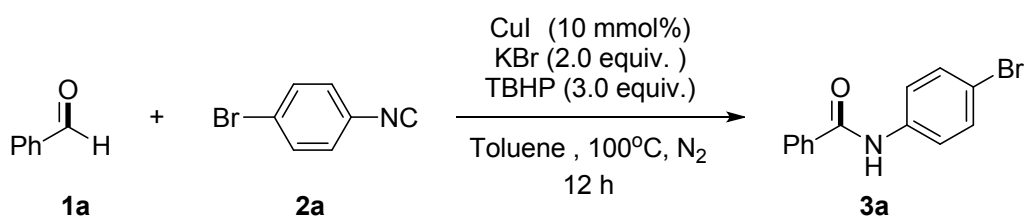

**Typical synthetic procedure** (with **3a** as an example): A mixture of **1a** (100  $\mu\text{L}$ , 1.0 mmol) and **2a** (90 mg, 0.5 mmol) in toluene (2.0 mL) stirred at 100 °C, until the substrate **2a** was consumed as indicated by TLC about 12 h. The resulting mixture was concentrated and the residue was taken up in DCM. The organic layer was washed with brine, dried over  $\text{MgSO}_4$  and concentrated. Purification of the crude product by column chromatography (silica gel; petroleum ether: ethyl acetate = 2: 1) afforded **3a** in 81% yield as a white solid.

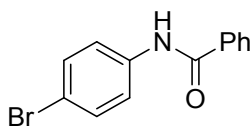

**N-(4-bromophenyl)benzamide (3a)**: Yield 81% (111 mg). White solid, m.p. 205-206 °C;  $^1\text{H-NMR}$  (400 MHz,  $\text{CDCl}_3$ )  $\delta_{\text{H}}$  7.48~7.52 (m, 4H), 7.55~7.59 (m, 3H), 7.81 (s, 1H), 7.86 (d,  $J = 7.6$  Hz, 2H);  $^{13}\text{C-NMR}$  ( $\text{DMSO-}d_6$ , 100 MHz)  $\delta_{\text{C}}$  115.8, 122.7, 128.2, 128.9, 131.9, 132.2, 135.2, 139.1, 166.1; **HRMS** (ESI-TOF)  $m/z$  calculated for  $\text{C}_{13}\text{H}_{10}\text{BrNONa}$   $[\text{M}+\text{Na}]^+$ : 297.9843, found: 297.9840.

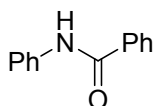

**N-phenylbenzamide (3b)**: Yield 84% (83 mg). White solid, m.p. 163-164 °C;  $^1\text{H-NMR}$  (400 MHz,  $\text{CDCl}_3$ )  $\delta_{\text{H}}$  7.15 (t,  $J = 7.6$  Hz, 1H), 7.36 (t,  $J = 8.0$  Hz, 2H), 7.45~7.49 (m, 2H), 7.52~7.56 (m, 1H), 7.64 (d,  $J = 8.0$  Hz, 2H), 7.86 (d,  $J = 7.6$  Hz, 2H), 7.89 (s, 1H);  $^{13}\text{C-NMR}$  ( $\text{CDCl}_3$ , 100 MHz)  $\delta_{\text{C}}$  120.2, 124.5, 127.0, 128.8, 129.1, 131.8, 135.0, 137.9, 165.7; **HRMS** (ESI-TOF)  $m/z$

calculated for  $C_{13}H_{11}NONa$   $[M+Na]^+$  : 220.0738, found: 220.0739. -----

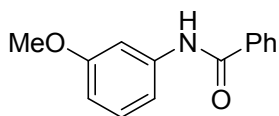

**N-(3-methoxyphenyl)benzamide (3c)**: Yield 87% (99 mg). White solid, m.p. 109-110 °C;  $^1H$ -NMR (400 MHz,  $CDCl_3$ )  $\delta_H$  3.83 (s, 3H), 6.73 (dd,  $J = 2.4, 8.4$  Hz, 1H), 7.14 (d,  $J = 8.0$  Hz, 1H), 7.27 (t,  $J = 7.6$  Hz, 1H), 7.46~7.50 (m, 3H), 7.54~7.58 (m, 1H), 7.88 (d,  $J = 7.6$  Hz, 2H), 8.00 (s, 1H);  $^{13}C$ -NMR ( $CDCl_3$ , 100 MHz)  $\delta_C$  55.2, 105.8, 110.4, 112.4, 127.0, 128.6, 129.6, 131.7, 134.8, 139.1, 160.1, 165.9; **HRMS** (ESI-TOF) m/z calculated for  $C_{14}H_{13}NO_2Na$   $[M+Na]^+$  : 250.0844, found: 250.0846. -----

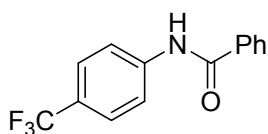

**N-(4-(trifluoromethyl)phenyl)benzamide (3d)**: Yield 46% (61 mg). White solid, m.p. 205-206 °C;  $^1H$ -NMR (400 MHz,  $DMSO-d_6$ )  $\delta_H$  7.54~7.58 (m, 2H), 7.61~7.65 (m, 1H), 7.74 (d,  $J = 8.4$  Hz, 2H), 7.98 (d,  $J = 7.6$  Hz, 2H), 8.03 (d,  $J = 8.4$  Hz, 2H), 10.60 (s, 1H);  $^{13}C$ -NMR (100 MHz,  $DMSO-d_6$ )  $\delta_C$  120.6, 123.5, 123.9, 124.2, 126.2, 126.3, 126.39, 126.43, 128.3, 129.0, 132.4, 135.0, 143.3, 166.5; **HRMS** (ESI-TOF) m/z calculated for  $C_{14}H_{10}F_3NONa$   $[M+Na]^+$  : 288.0612, found: 288.0605. -----

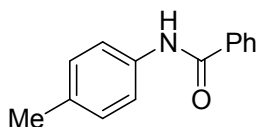

**N-(p-tolyl)benzamide (3e)**: Yield 72% (76 mg). White solid, m.p. 159-160 °C;  $^1H$ -NMR (400 MHz,  $CDCl_3$ )  $\delta_H$  2.34 (s, 3H), 7.16 (d,  $J = 8.4$  Hz, 2H), 7.44~7.48 (m, 2H), 7.51~7.55 (m, 3H), 7.85 (d,  $J = 7.2$  Hz, 3H);  $^{13}C$ -NMR (100 MHz,  $CDCl_3$ )  $\delta_C$  20.9, 120.3, 127.0, 128.7, 129.5, 131.7, 134.2, 135.0, 135.3, 165.6; **HRMS** (ESI-TOF) m/z calculated for  $C_{14}H_{13}NONa$   $[M+Na]^+$ : 234.0895, found: 234.0899. -----

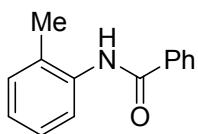

**N-(o-tolyl)benzamide (3f)**: Yield 63% (66 mg). White solid, m.p. 146-147 °C;  $^1H$ -NMR (400 MHz,  $CDCl_3$ )  $\delta_H$  2.36 (s, 3H), 7.13~7.17 (m, 1H), 7.25~7.29 (m, 2H), 7.50~7.54 (m, 2H), 7.57~7.61 (m, 1H), 7.73 (s, 1H), 7.92 (d,  $J = 7.6$  Hz, 2H), 7.97 (d,  $J =$

8.0 Hz, 1H);  $^{13}\text{C-NMR}$  (100 MHz,  $\text{CDCl}_3$ )  $\delta_{\text{C}}$  17.9, 123.1, 125.4, 126.9, 127.1, 128.8, 129.3, 130.6, 131.9, 135.0, 135.8, 165.7; **HRMS** (ESI-TOF)  $m/z$  calculated for  $\text{C}_{14}\text{H}_{13}\text{NONa}$   $[\text{M}+\text{Na}]^+$  : 234.0895, found: 234.0897. -----

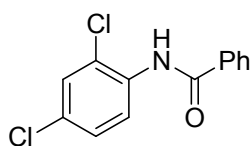

**N-(2,4-dichlorophenyl)benzamide (3g)**: Yield 42% (56 mg). White solid, m.p. 117-118 °C;  $^1\text{H-NMR}$  (400 MHz,  $\text{CDCl}_3$ )  $\delta_{\text{H}}$  7.32 (dd,  $J = 2.4, 8.8$  Hz, 1H), 7.44 (d,  $J = 2.4$  Hz, 1H), 7.52~7.63 (m, 3H), 7.93 (d,  $J = 7.6$  Hz, 2H), 8.41 (s, 1H), 8.55 (d,  $J = 9.2$  Hz, 1H);  $^{13}\text{C-NMR}$  (100 MHz,  $\text{CDCl}_3$ )  $\delta_{\text{C}}$  122.1, 123.5, 127.0, 128.0, 128.7, 128.9, 129.1, 132.3, 133.4, 134.2, 165.2; **HRMS** (ESI-TOF)  $m/z$  calculated for  $\text{C}_{13}\text{H}_9\text{Cl}_2\text{NONa}$   $[\text{M}+\text{Na}]^+$  : 287.9959, found: 287.9958. -----

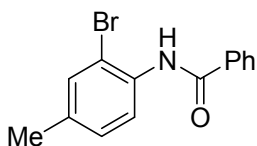

**N-(2-bromo-4-methylphenyl)benzamide (3h)**: Yield 59% (85 mg). White solid, m.p. 147-148 °C;  $^1\text{H-NMR}$  (400 MHz,  $\text{CDCl}_3$ )  $\delta_{\text{H}}$  2.35 (s, 3H), 7.20 (d,  $J = 8.4$  Hz, 1H), 7.43 (s, 1H), 7.52~7.56 (m, 2H), 7.58~7.62 (m, 1H), 7.96 (d,  $J = 7.2$  Hz, 2H), 8.41~8.43 (m, 2H);  $^{13}\text{C-NMR}$  ( $\text{CDCl}_3$ , 100 MHz)  $\delta_{\text{C}}$  20.1, 113.6, 121.6, 127.0, 128.9, 129.1, 132.0, 132.5, 133.2, 134.6, 135.3, 165.1; **HRMS** (ESI-TOF)  $m/z$  calculated for  $\text{C}_{14}\text{H}_{12}\text{BrNONa}$   $[\text{M}+\text{Na}]^+$  : 311.9994, found: 312.0010. -----

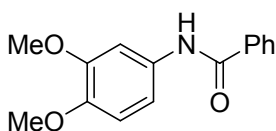

**N-(3,4-dimethoxyphenyl)benzamide (3i)**: Yield 76% (98 mg). White solid, m.p. 173-175 °C;  $^1\text{H-NMR}$  (400 MHz,  $\text{CDCl}_3$ )  $\delta_{\text{H}}$  3.83 (s, 3H), 3.86 (s, 3H), 6.81 (d,  $J = 8.4$  Hz, 1H), 7.02 (d,  $J = 8.0$  Hz, 1H), 7.42~7.45 (m, 3H), 7.50~7.53 (m, 1H), 7.86 (d,  $J = 7.6$  Hz, 2H), 8.07 (s, 1H);  $^{13}\text{C-NMR}$  ( $\text{CDCl}_3$ , 100 MHz)  $\delta_{\text{C}}$  55.8, 56.0, 105.1, 111.1, 112.2, 126.9, 128.7, 131.5, 131.7, 134.8, 145.9, 148.9, 165.7; **HRMS** (ESI-TOF)  $m/z$  calculated for  $\text{C}_{15}\text{H}_{15}\text{NO}_3\text{Na}$   $[\text{M}+\text{Na}]^+$  : 280.0950, found: 280.0945. -----

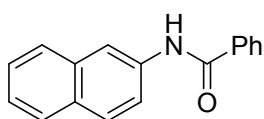

***N*-(naphthalen-2-yl)benzamide (3j)**: Yield 73% (90 mg). White solid, m.p. 165-166 °C; **<sup>1</sup>H-NMR** (400 MHz, CDCl<sub>3</sub>) δ<sub>H</sub> 7.45 (d, *J* = 8.4 Hz 1H), 7.48~7.52 (m, 3H), 7.56~7.59 (m, 1H), 7.62 (dd, *J* = 1.6, 8.8 Hz, 1H), 7.80~7.84 (m, 3H), 7.93 (d, *J* = 8.0 Hz, 2H), 8.18 (s, 1H), 8.36 (s, 1H); **<sup>13</sup>C-NMR** (CDCl<sub>3</sub>, 100 MHz) δ<sub>C</sub> 117.0, 120.1, 125.1, 126.5, 127.0, 127.5, 127.7, 128.76, 128.78, 130.7, 131.9, 133.8, 134.9, 135.3, 165.9; **HRMS** (ESI-TOF) *m/z* calculated for C<sub>17</sub>H<sub>13</sub>NONa [M+Na]<sup>+</sup> : 270.0895, found: 270.0907. -----

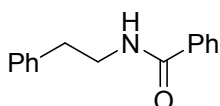

***N*-phenethylbenzamide (3k)**: Yield 61% (69 mg). White solid, m.p. 117-118 °C; **<sup>1</sup>H-NMR** (400 MHz, CDCl<sub>3</sub>) δ<sub>H</sub> 2.93 (t, *J* = 6.8 Hz, 2H), 3.68~3.73 (m, 2H), 6.28 (s, 1H), 7.22~7.25 (m, 3H), 7.30~7.32 (m, 2H), 7.37~7.39 (m, 2H), 7.45~7.48 (m, 1H), 7.69 (d, *J* = 7.6 Hz, 2H); **<sup>13</sup>C-NMR** (100 MHz, CDCl<sub>3</sub>) δ<sub>C</sub> 35.6, 41.1, 126.5, 126.8, 128.5, 128.6, 128.7, 131.3, 134.6, 138.9, 167.4; **HRMS** (ESI-TOF) *m/z* calculated for C<sub>15</sub>H<sub>15</sub>NONa [M+Na]<sup>+</sup> : 248.1051, found: 248.1028. -----

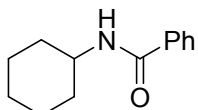

***N*-cyclohexylbenzamide (3l)**: Yield 76% (77 mg). White solid, m.p. 146-147 °C; **<sup>1</sup>H-NMR** (400 MHz, CDCl<sub>3</sub>) δ<sub>H</sub> 1.18~1.29 (m, 3H), 1.37~1.46 (m, 2H), 1.63~1.66 (m, 1H), 1.73~1.76 (m, 2H), 2.02 (d, *J* = 11.6 Hz, 2H), 3.94~4.01 (m, 1H), 6.10 (s, 1H), 7.38~7.42 (m, 2H), 7.45~7.49 (m, 1H), 7.75 (d, *J* = 7.2 Hz, 2H); **<sup>13</sup>C-NMR** (CDCl<sub>3</sub>, 100 MHz) δ<sub>C</sub> 24.9, 25.5, 33.2, 48.6, 126.8, 128.4, 131.1, 135.0, 166.6; **HRMS** (ESI-TOF) *m/z* calculated for C<sub>13</sub>H<sub>17</sub>NONa [M+Na]<sup>+</sup> : 226.1208, found: 226.1215. -----

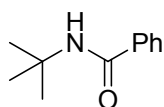

***N*-(*tert*-butyl)benzamide (3m)**: Yield 78% (69 mg). White solid, m.p. 134-135 °C; **<sup>1</sup>H-NMR** (400 MHz, CDCl<sub>3</sub>) δ<sub>H</sub> 1.47 (s, 9H), 5.98 (s, 1H), 7.38~7.42 (m, 2H), 7.45~7.48 (m, 1H), 7.72 (d, *J* = 7.6 Hz, 2H); **<sup>13</sup>C-NMR** (100 MHz, CDCl<sub>3</sub>) δ<sub>C</sub> 28.8, 51.5, 126.6, 128.4, 131.0, 135.8, 166.9; **HRMS** (ESI-TOF) *m/z* calculated for C<sub>11</sub>H<sub>15</sub>NONa [M+Na]<sup>+</sup> : 200.1051, found: 200.1050. -----

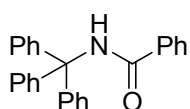

***N*-tritylbenzamide (3n)**: Yield 32% (58 mg). White solid, m.p. 160-162 °C; <sup>1</sup>H-NMR (400 MHz, CDCl<sub>3</sub>) δ<sub>H</sub> 7.25~7.30 (m, 16H), 7.39~7.43 (m, 2H), 7.46~7.50 (m, 1H), 7.79 (d, *J* = 7.6 Hz, 2H); <sup>13</sup>C-NMR (100 MHz, CDCl<sub>3</sub>) δ<sub>C</sub> 70.7, 126.9, 127.1, 128.0, 128.6, 128.63, 131.5, 135.2, 144.6, 166.3; **HRMS** (ESI-TOF) *m/z* calculated for C<sub>26</sub>H<sub>21</sub>NONa [M+Na]<sup>+</sup> : 386.1521, found: 386.1526. -----

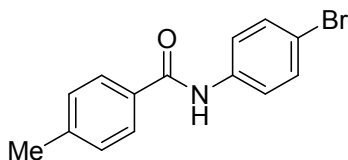

***N*-(4-bromophenyl)-4-methylbenzamide (4a)**: Yield 85% (123 mg). White solid, m.p. 185-186 °C; <sup>1</sup>H-NMR (400 MHz, DMSO-*d*<sub>6</sub>) δ<sub>H</sub> 2.38 (s, 3H), 7.33 (d, *J* = 8.0 Hz, 2H), 7.53 (d, *J* = 8.8 Hz, 2H), 7.76~7.78 (m, 2H), 7.87 (d, *J* = 8.0 Hz, 2H), 10.29 (s, 1H); <sup>13</sup>C-NMR (100 MHz, DMSO-*d*<sub>6</sub>) δ<sub>C</sub> 21.5, 115.7, 122.7, 128.2, 129.4, 131.9, 132.3, 139.2, 142.3, 165.9; **HRMS** (ESI-TOF) *m/z* calculated for C<sub>14</sub>H<sub>12</sub>BrNONa [M+Na]<sup>+</sup> : 312.0000, found: 312.0002. -----

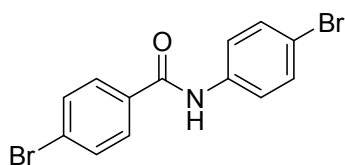

**4-Bromo-*N*-(4-bromophenyl)benzamide (4b)**: Yield 66% (116 mg). White solid, m.p. 234-235 °C; <sup>1</sup>H-NMR (400 MHz, DMSO-*d*<sub>6</sub>) δ<sub>H</sub> 7.54 (d, *J* = 8.4 Hz, 2H), 7.74~7.78 (m, 4H), 7.91 (d, *J* = 8.4 Hz, 2H), 10.45 (s, 1H); <sup>13</sup>C-NMR (100 MHz, DMSO-*d*<sub>6</sub>) δ<sub>C</sub> 116.0, 122.7, 126.0, 130.3, 131.9, 131.93, 134.2, 138.9, 165.1; **HRMS** (ESI-TOF) *m/z* calculated for C<sub>13</sub>H<sub>10</sub>Br<sub>2</sub>NO [M+H]<sup>+</sup> : 353.9129, found: 353.9136. -----

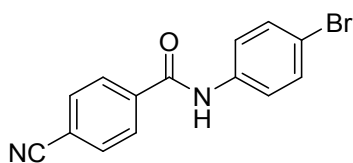

***N*-(4-bromophenyl)-4-cyanobenzamide (4c)**: Yield 57% (85 mg). White solid, m.p. 205-206 °C; <sup>1</sup>H-NMR (400 MHz, DMSO-*d*<sub>6</sub>) δ<sub>H</sub> 7.54~7.55 (m, 2H), 7.77 (d, *J* = 8.0 Hz, 2H), 8.01~8.04 (m, 2H), 8.11 (d, *J* = 8.0 Hz, 2H), 10.62 (s, 1H); <sup>13</sup>C-NMR (100 MHz, DMSO-*d*<sub>6</sub>) δ<sub>C</sub> 114.5, 116.3, 118.8, 122.8, 129.1, 132.0, 132.9, 138.6, 139.1, 164.7; **HRMS** (ESI-TOF) *m/z* calculated for C<sub>14</sub>H<sub>10</sub>BrN<sub>2</sub>O [M+H]<sup>+</sup> : 300.9977, found: 300.9973. -----

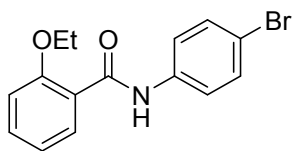

***N*-(4-bromophenyl)-2-ethoxybenzamide (4d)**: Yield 78% (124 mg). White solid, m.p. 191-192 °C; <sup>1</sup>H-NMR (400 MHz, DMSO-*d*<sub>6</sub>) δ<sub>H</sub> 1.39 (t, *J* = 6.8 Hz, 3H), 4.16 (q, *J* = 6.8 Hz, 2H), 7.07 (t, *J* = 7.6 Hz, 1H), 7.16 (d, *J* = 8.0 Hz, 1H), 7.48~7.55 (m, 3H), 7.68~7.74 (m, 3H), 10.26 (s, 1H); <sup>13</sup>C-NMR (100 MHz, DMSO-*d*<sub>6</sub>) δ<sub>C</sub> 15.0, 64.7, 113.4, 115.5, 121.0, 121.8, 124.7, 130.5, 132.1, 132.9, 138.9, 156.4, 164.9; **HRMS** (ESI-TOF) *m/z* calculated for C<sub>15</sub>H<sub>14</sub>BrNO<sub>2</sub>Na [M+Na]<sup>+</sup> : 342.0106, found: 342.0113. -

---

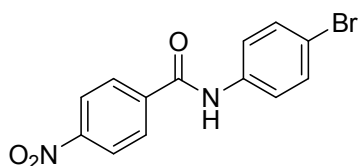

***N*-(4-bromophenyl)-4-nitrobenzamide (4e)**: Yield 37% (59 mg). Yellow solid, m.p. 247-248 °C; <sup>1</sup>H-NMR (400 MHz, DMSO-*d*<sub>6</sub>) δ<sub>H</sub> 7.55 (d, *J* = 8.8 Hz, 2H), 7.76 (d, *J* = 8.8 Hz, 2H), 8.21 (d, *J* = 8.8 Hz, 2H), 8.41 (d, *J* = 8.8 Hz, 2H), 10.71 (s, 1H); <sup>13</sup>C-NMR (100 MHz, DMSO-*d*<sub>6</sub>) δ<sub>C</sub> 117.4, 122.1, 126.7, 129.6, 134.3, 137.4, 140.1, 152.1, 165.1; **HRMS** (ESI-TOF) *m/z* calculated for C<sub>13</sub>H<sub>9</sub>BrN<sub>2</sub>O<sub>3</sub>Na [M+Na]<sup>+</sup> : 342.9694, found: 342.9698. -----

---

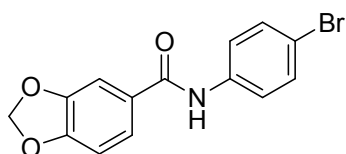

***N*-(4-bromophenyl)benzo[*d*][1,3]dioxole-5-carboxamide (4f)**: Yield 89% (142 mg). White solid, m.p. 222-223 °C; <sup>1</sup>H-NMR (400 MHz, CDCl<sub>3</sub>) δ<sub>H</sub> 6.11 (s, 2H), 7.16 (d, *J* = 8.8 Hz, 1H), 7.43 (d, *J* = 8.8 Hz, 1H), 7.56 (s, 1H), 7.66 (d, *J* = 8.0 Hz, 2H), 7.81 (d, *J* = 8.0 Hz, 2H), 8.83 (s, 1H); <sup>13</sup>C-NMR (100 MHz, CDCl<sub>3</sub>) δ<sub>C</sub> 102.2, 105.8, 107.4, 115.4, 120.6, 121.4, 126.2, 131.7, 139.4, 149.1, 151.1, 165.9; **HRMS** (ESI-TOF) *m/z* calculated for C<sub>14</sub>H<sub>10</sub>BrNO<sub>3</sub>Na [M+Na]<sup>+</sup> : 341.9742, found: 341.9747. -----

---

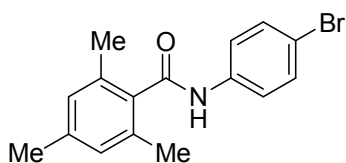

***N*-(4-bromophenyl)-2,4,6-trimethylbenzamide (4g)**: Yield 63% (100 mg). White solid, m.p. 217-218 °C; <sup>1</sup>H-NMR (400 MHz, CDCl<sub>3</sub>) δ<sub>H</sub> 2.18 (s, 3H), 2.22(s, 3H), 2.26 (s, 3H), 6.96 (s, 2H), 7.49 (d, *J* = 8.8 Hz, 2H), 7.59 (d, *J* = 8.8 Hz, 2H), 8.23 (s, 1H); <sup>13</sup>C-NMR (100 MHz, CDCl<sub>3</sub>) δ<sub>C</sub> 18.2, 21.1, 120.2, 124.5, 127.0, 128.8, 129.1, 131.8, 135.0, 141.9, 168.7; **HRMS** (ESI-TOF) *m/z*

calculated for  $C_{16}H_{16}BrNONa$   $[M+Na]^+$ : 340.0313, found: 340.0319. -----

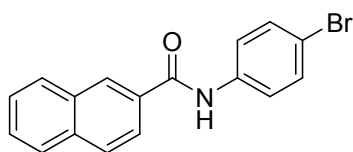

***N*-(4-bromophenyl)-2-naphthamide (4h)**: Yield 67 % (109 mg). White solid, m.p. 247-248 °C; **<sup>1</sup>H-NMR** (400 MHz, DMSO-*d*<sub>6</sub>)  $\delta_H$  7.57 (d, *J* = 8.8 Hz, 2H), 7.60~7.66 (m, 2H), 7.85 (d, *J* = 8.8 Hz, 2H), 8.00~8.10 (m, 4H), 8.60 (s, 1H), 10.59 (s, 1H); **<sup>13</sup>C-NMR** (100 MHz, DMSO-*d*<sub>6</sub>)  $\delta_C$  115.9, 122.7, 124.9, 127.4, 128.2, 128.4, 128.54, 128.57, 129.45, 132.0, 132.5, 132.54, 134.8, 139.1, 166.2; **HRMS** (ESI-TOF) *m/z* calculated for  $C_{17}H_{12}BrNONa$   $[M+Na]^+$  : 348.0000, found: 348.0002. -----

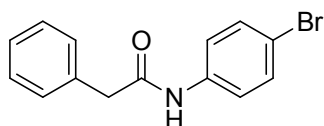

***N*-(4-bromophenyl)-2-phenylacetamide (3a')**: Yield 21 % (30 mg). White solid, m.p. 178-179 °C; **<sup>1</sup>H-NMR** (400 MHz, CDCl<sub>3</sub>)  $\delta_H$  3.71 (s, 2H), 7.23 (s, 1H), 7.30~7.41 (m, 9H); **<sup>13</sup>C-NMR** (100 MHz, CDCl<sub>3</sub>)  $\delta_C$  44.7, 117.0, 121.4, 127.7, 129.3, 129.5, 131.9, 134.1, 136.7, 169.1; **HRMS** (ESI-TOF) *m/z* calculated for  $C_{14}H_{12}BrNONa$   $[M+Na]^+$  : 311.9994, found: 311.9998.

---



### III. NMR spectra copies

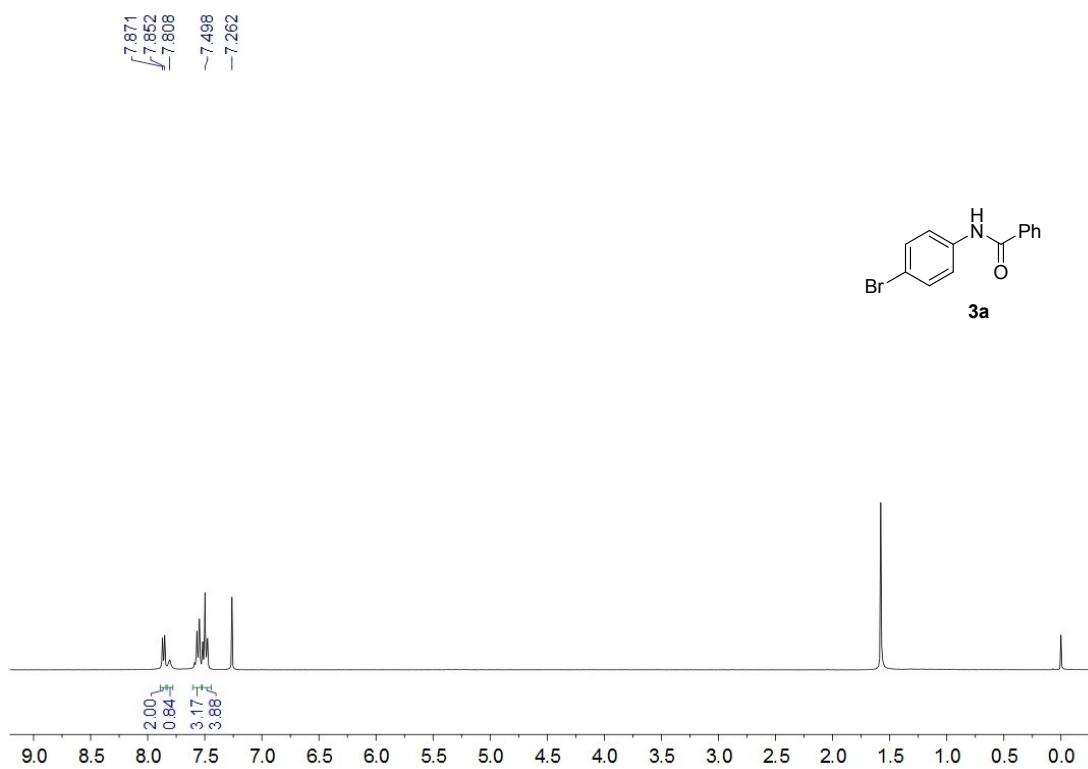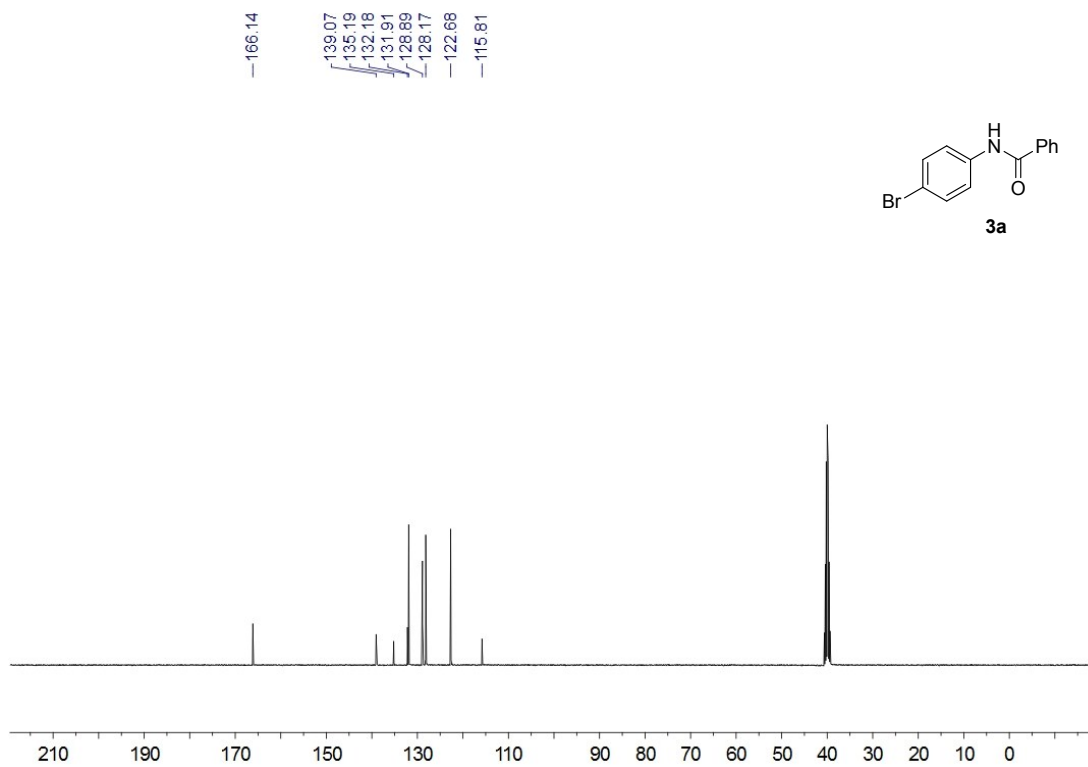

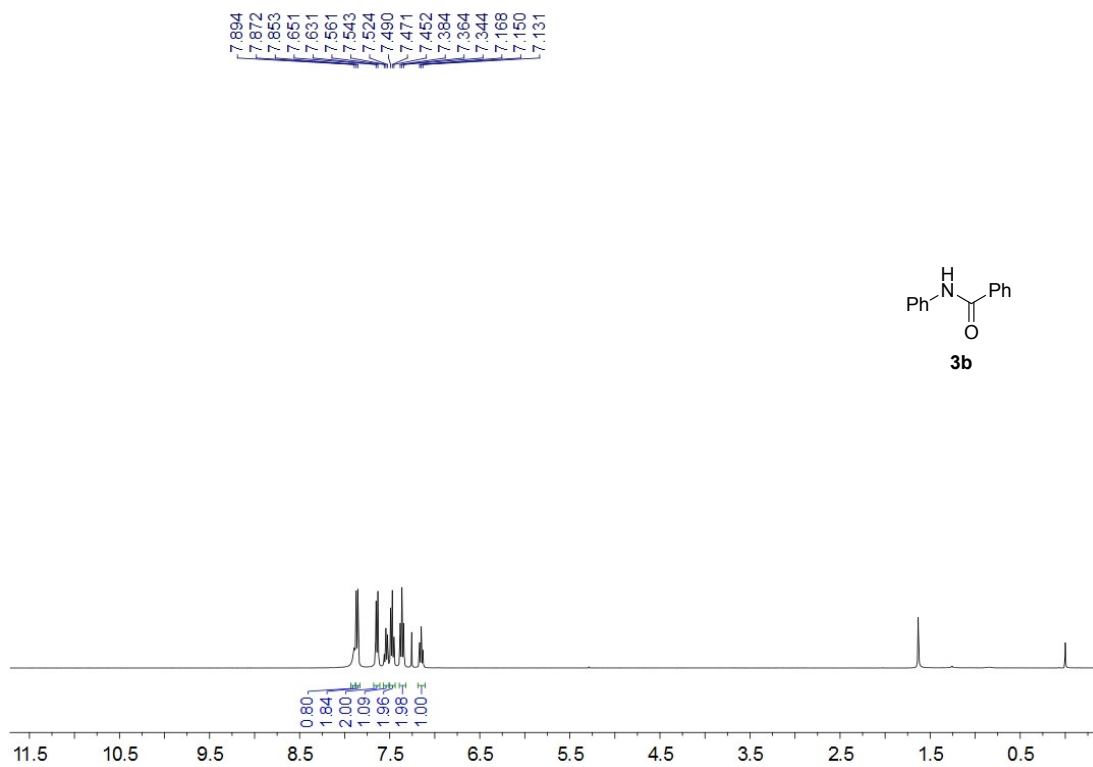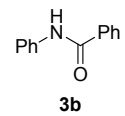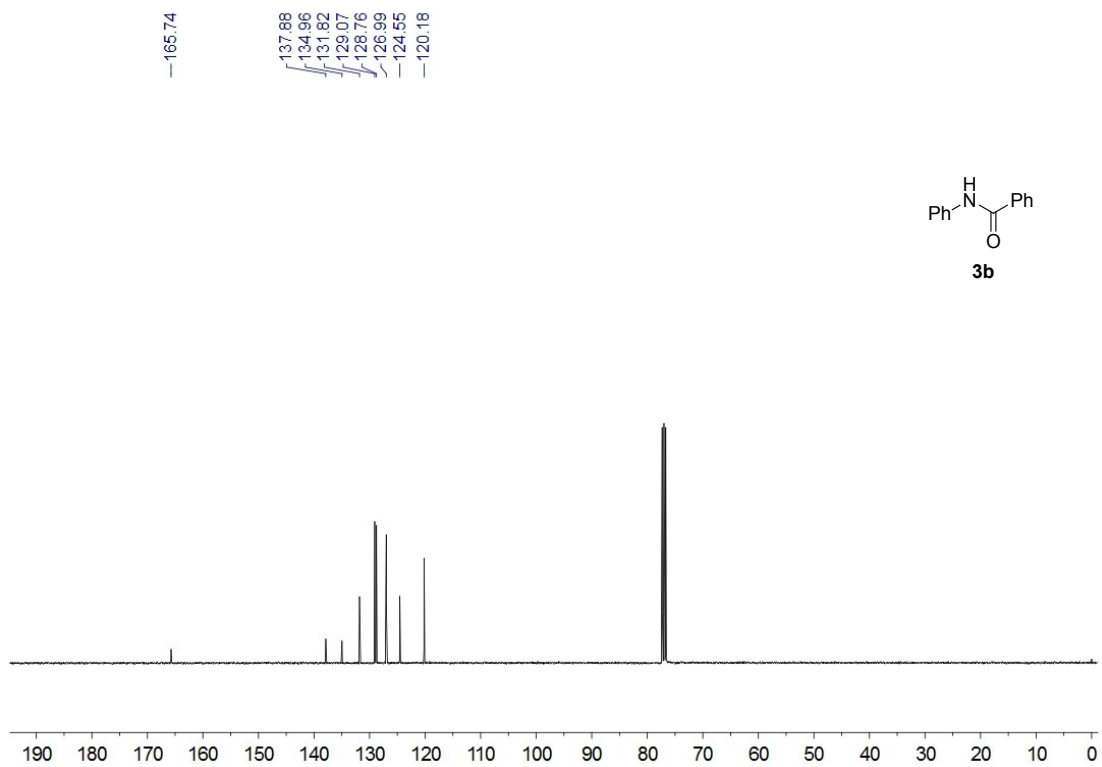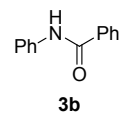

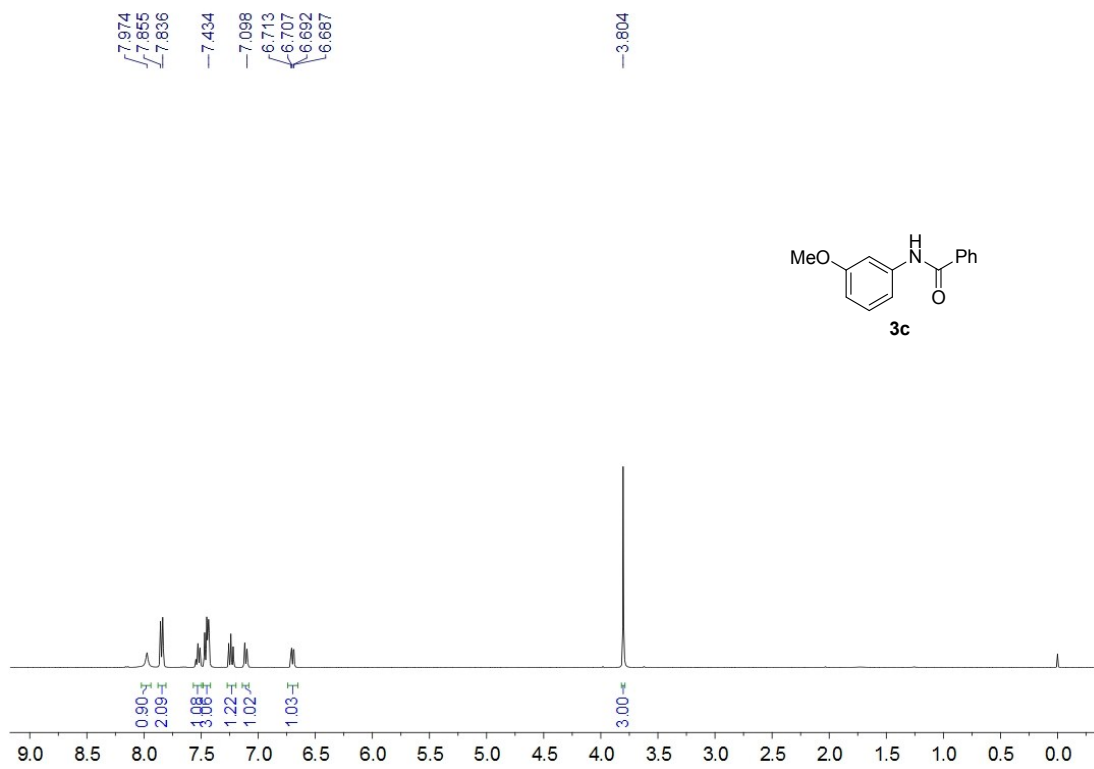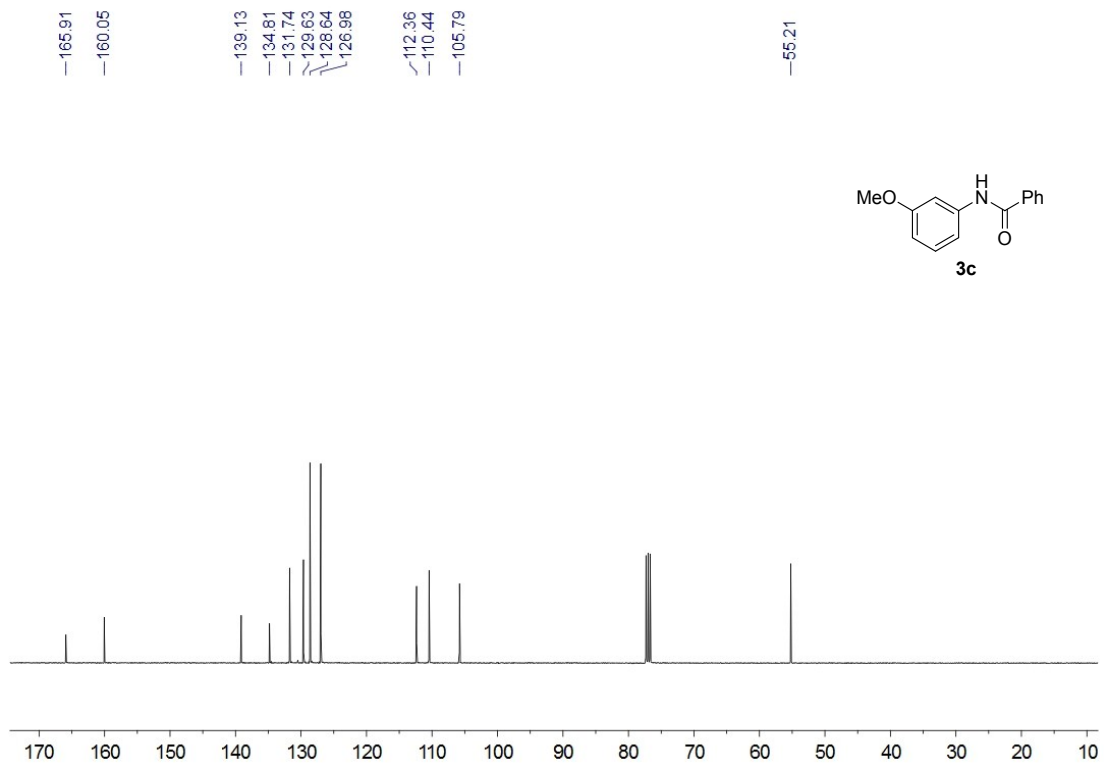

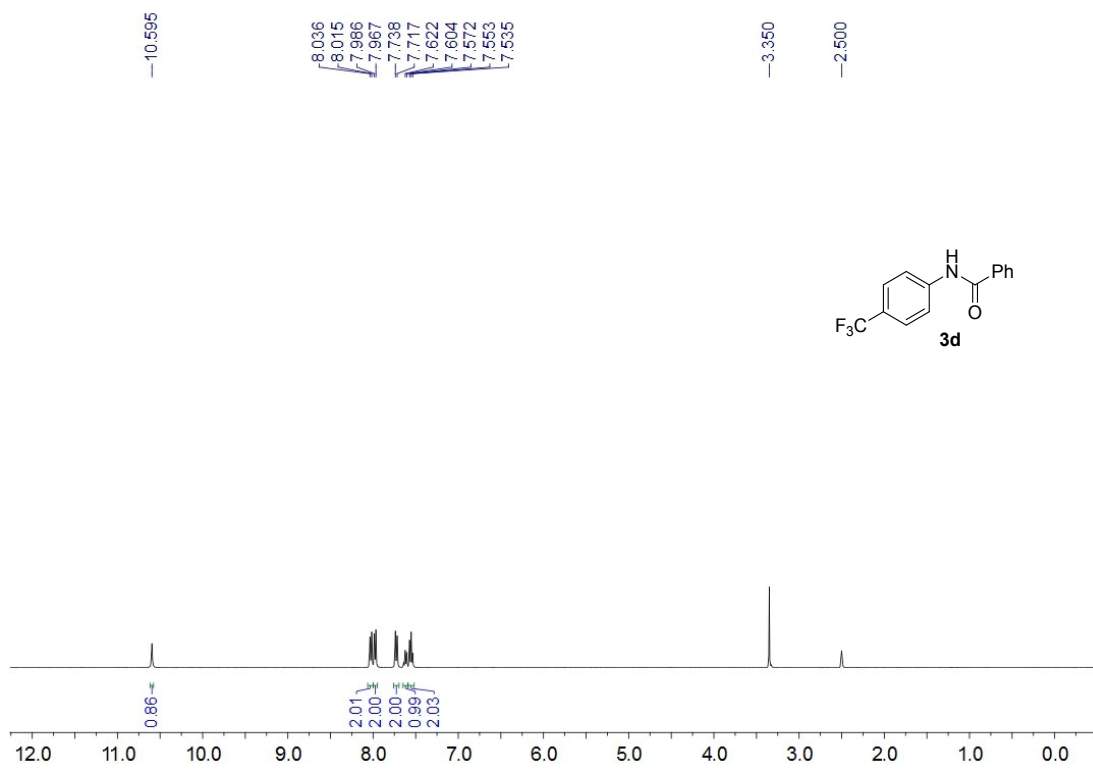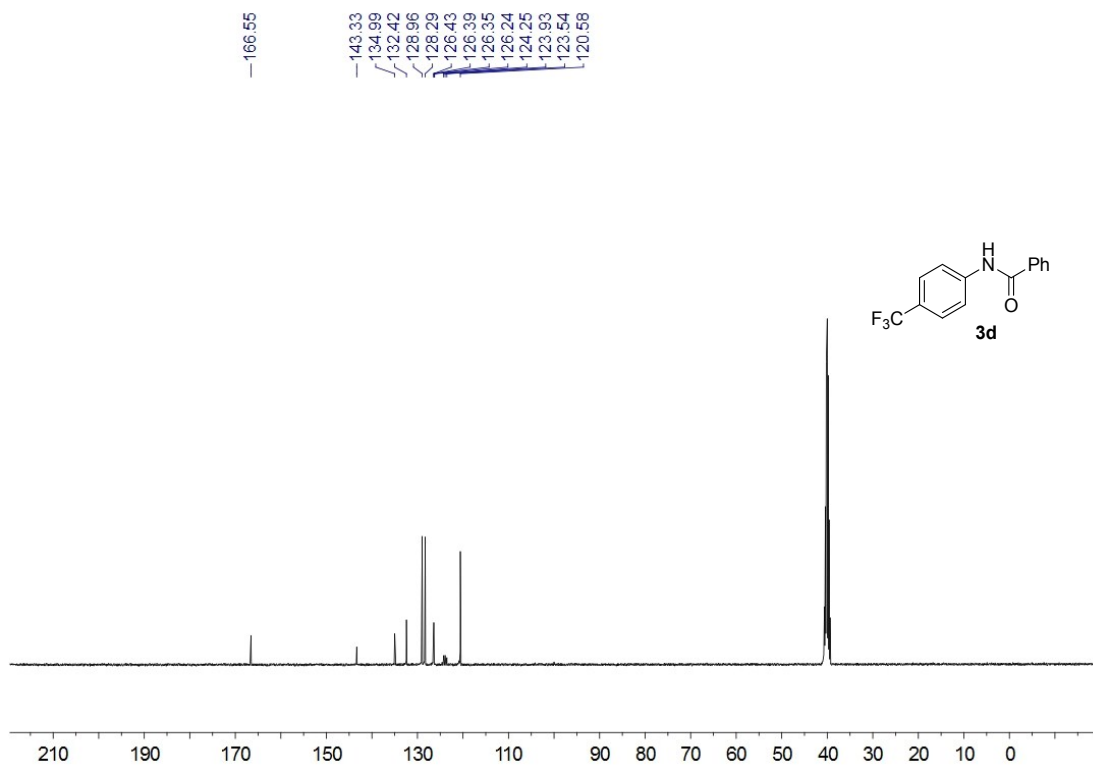

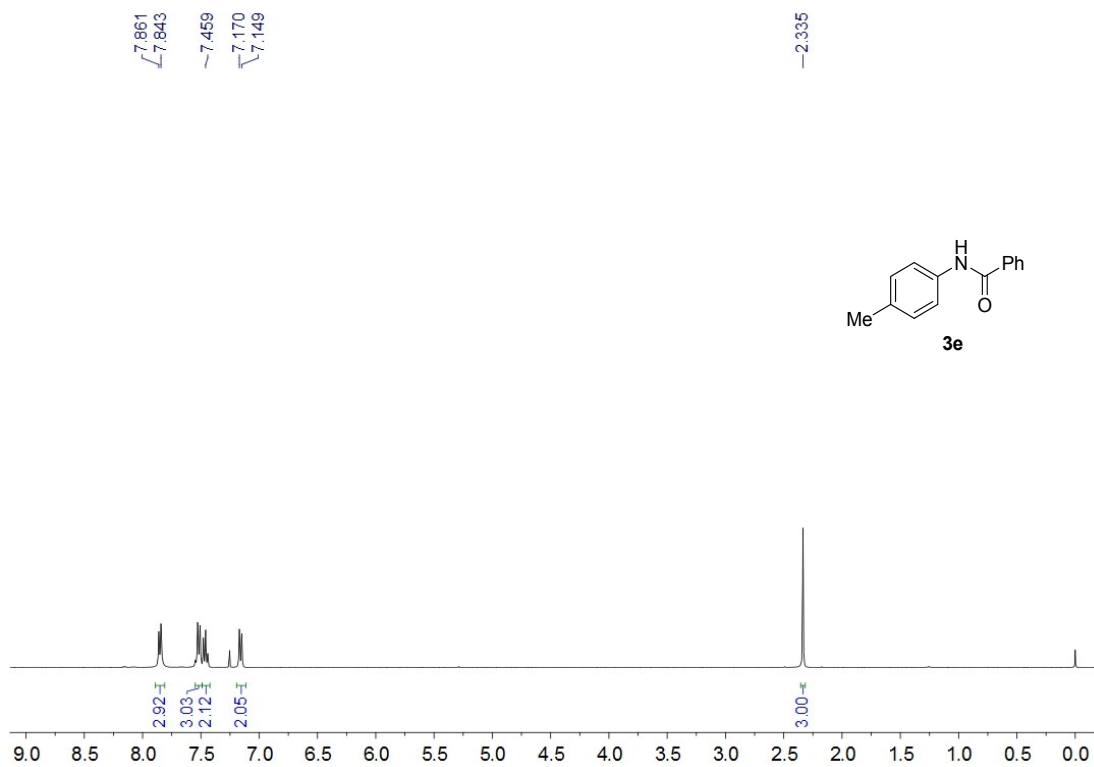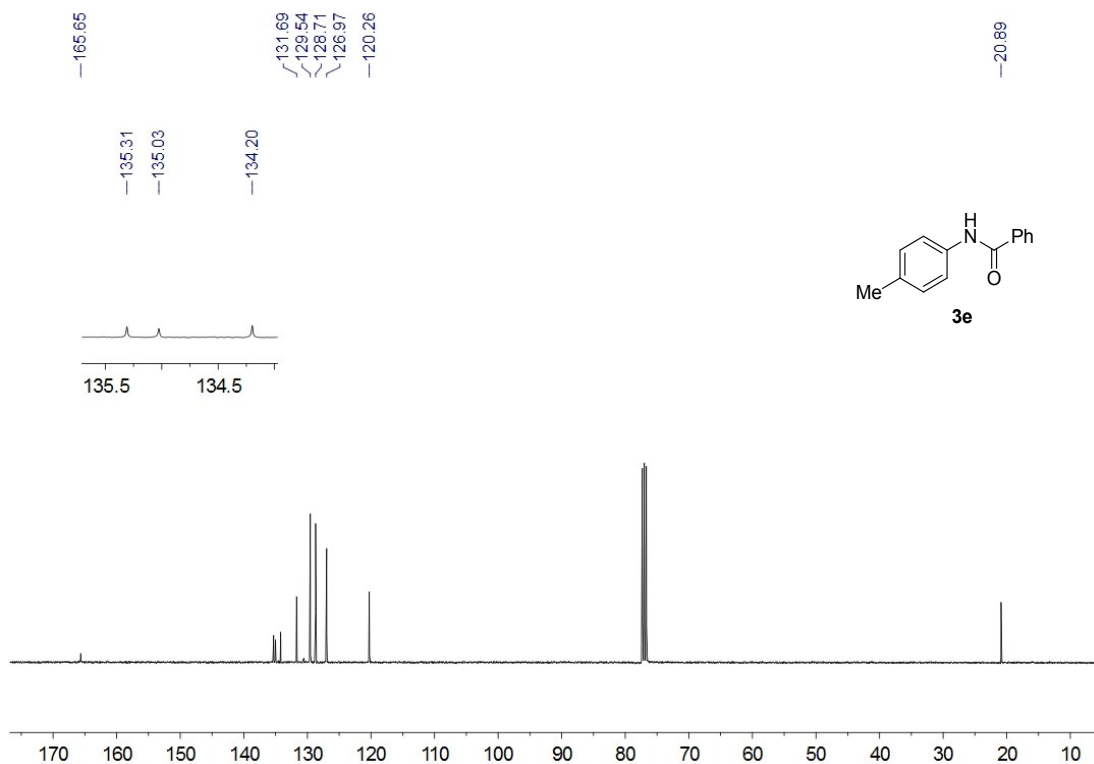

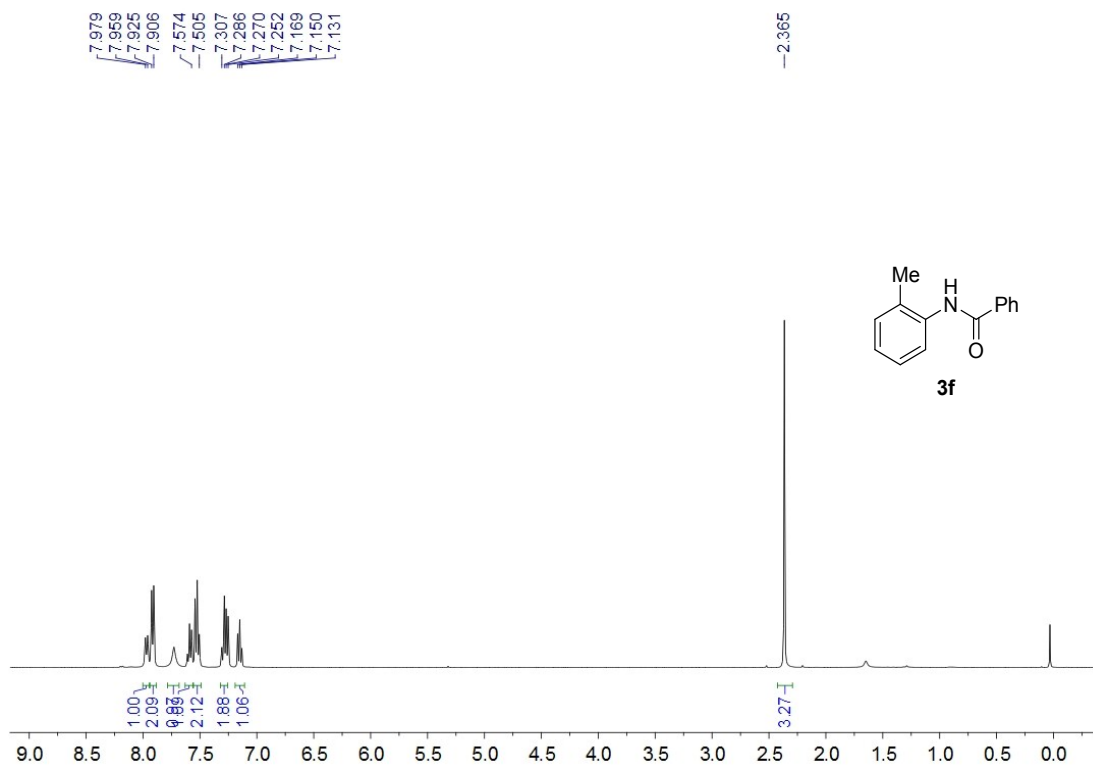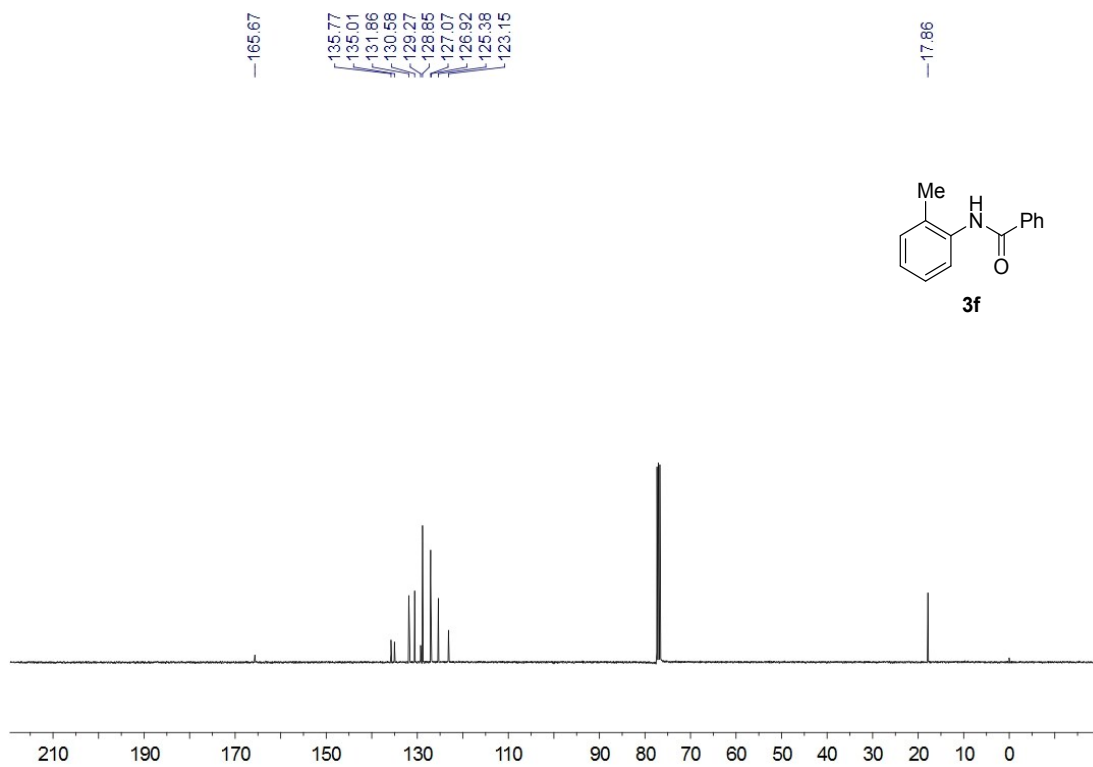

8.531  
8.508  
8.382  
7.906  
7.887  
7.562  
7.563  
7.528  
7.508  
7.490  
7.411  
7.405  
7.306  
7.300  
7.284  
7.278

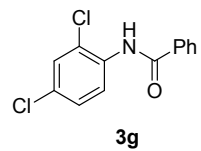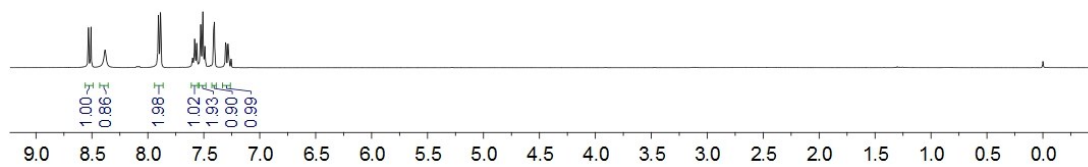

165.16  
134.19  
133.44  
132.33  
129.15  
128.95  
128.68  
127.98  
127.03  
123.49  
122.15

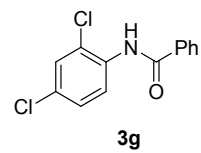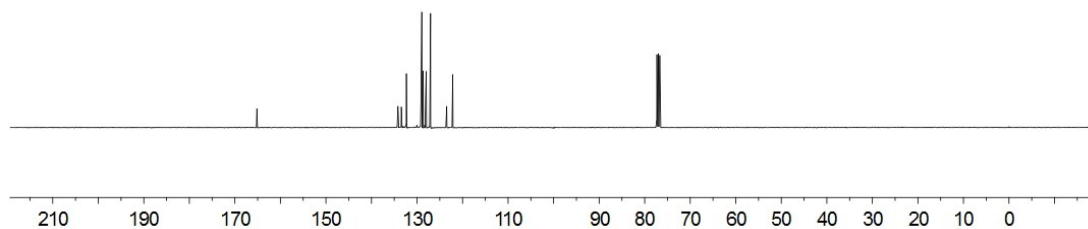

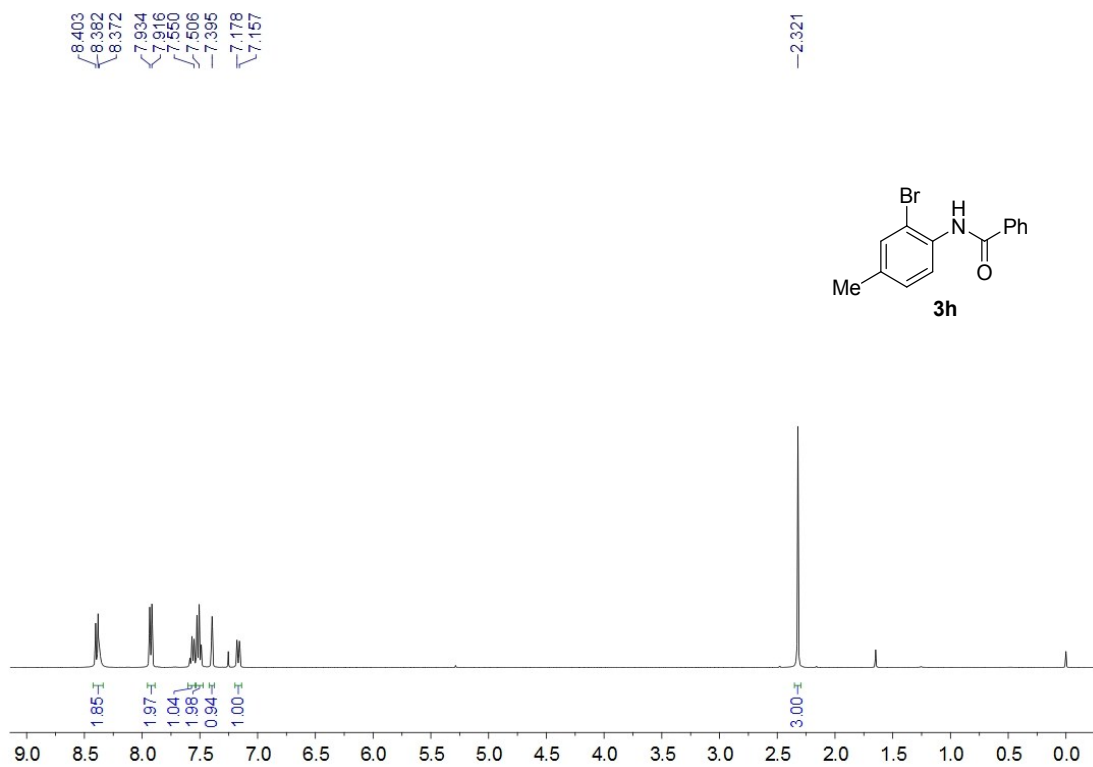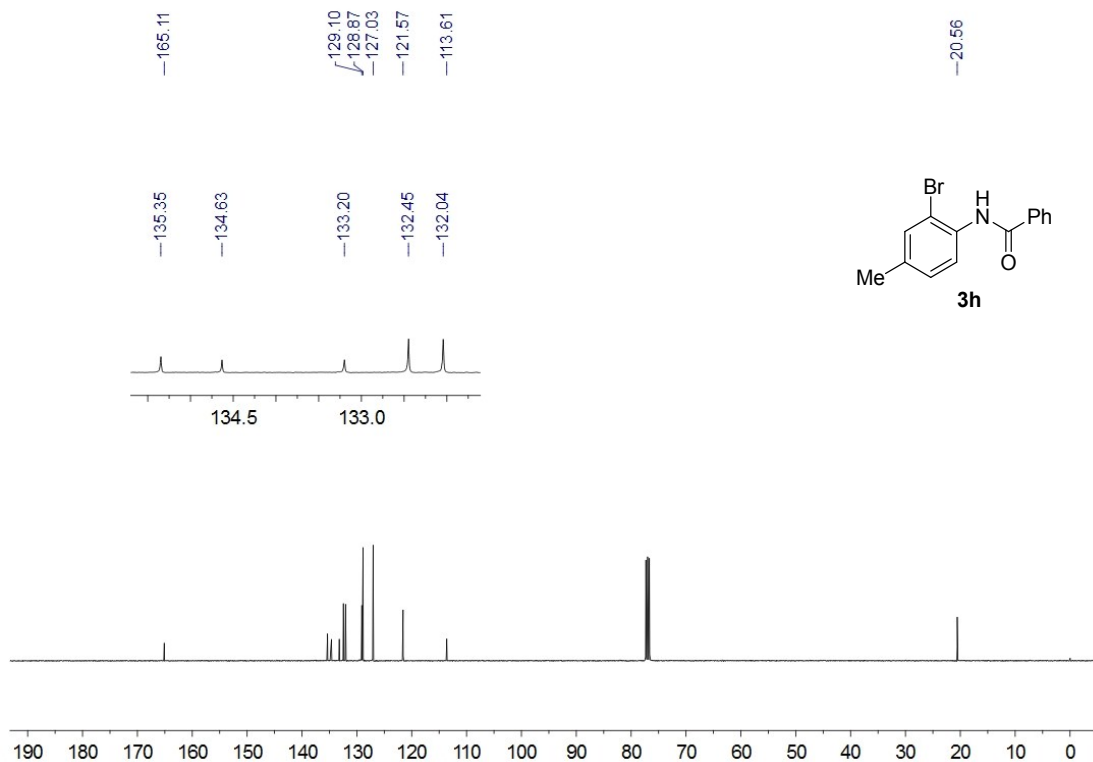



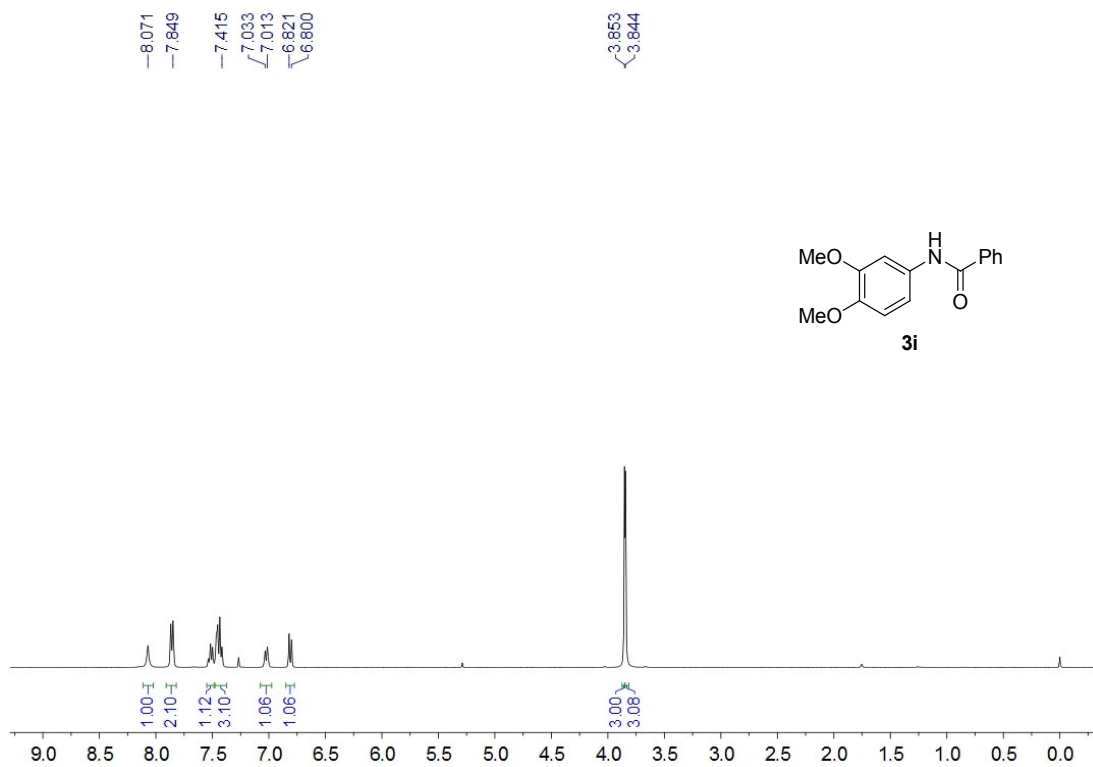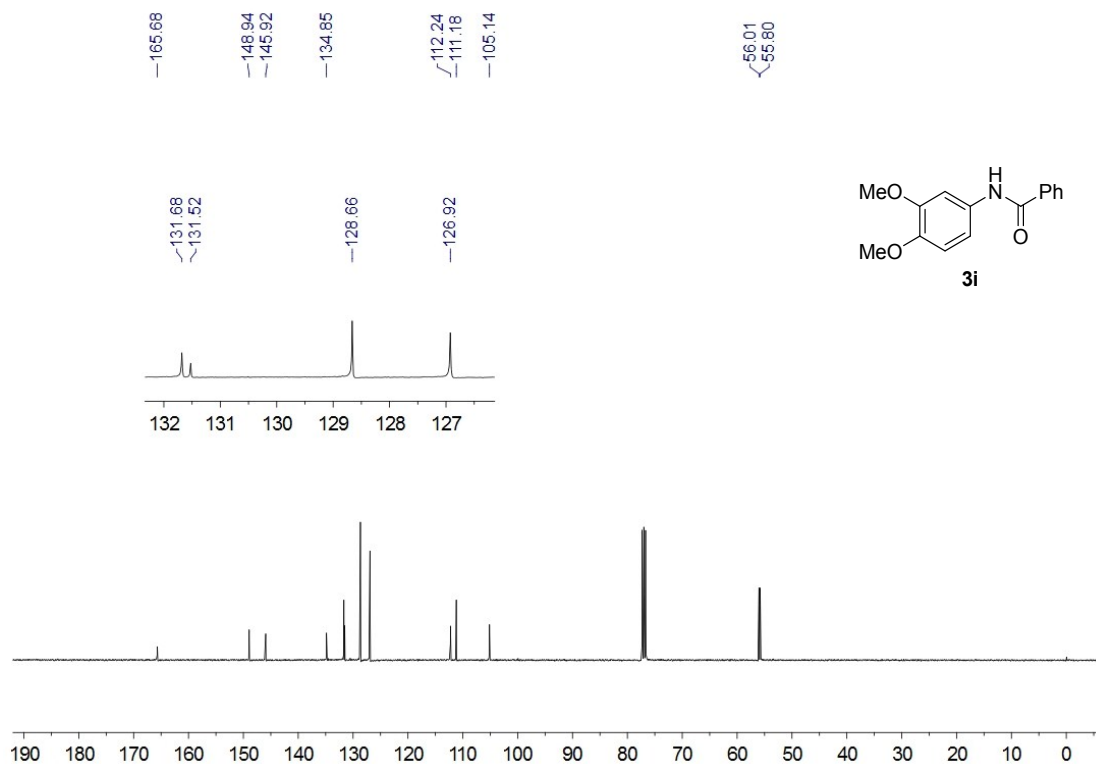

8.362  
8.183  
7.800  
7.637  
7.633  
7.615  
7.611  
7.591  
7.573  
7.554  
7.516  
7.496  
7.478  
7.475  
7.468  
7.464  
7.443  
7.427

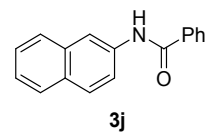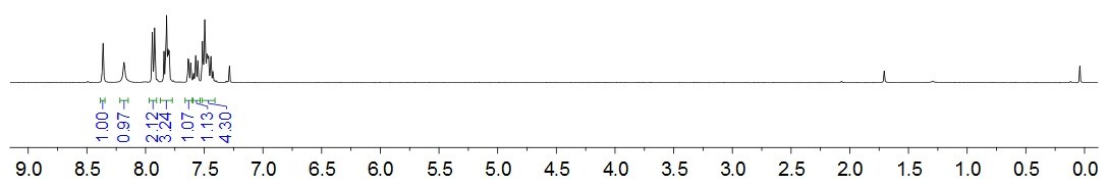

165.93  
135.32  
134.86  
133.78  
131.86  
130.71  
120.09  
117.05

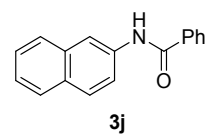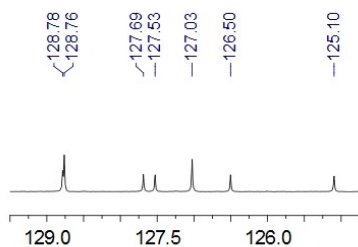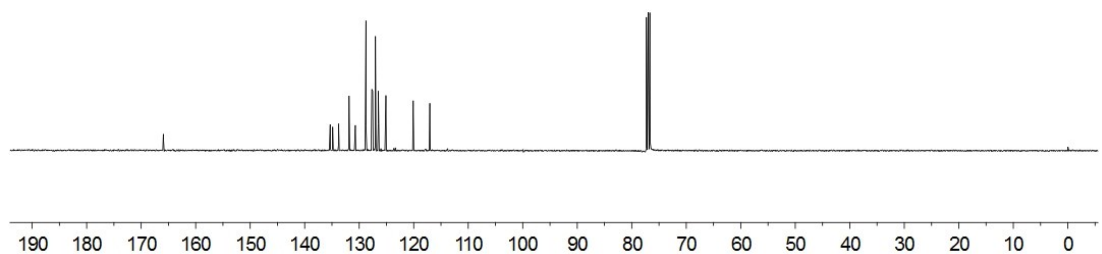

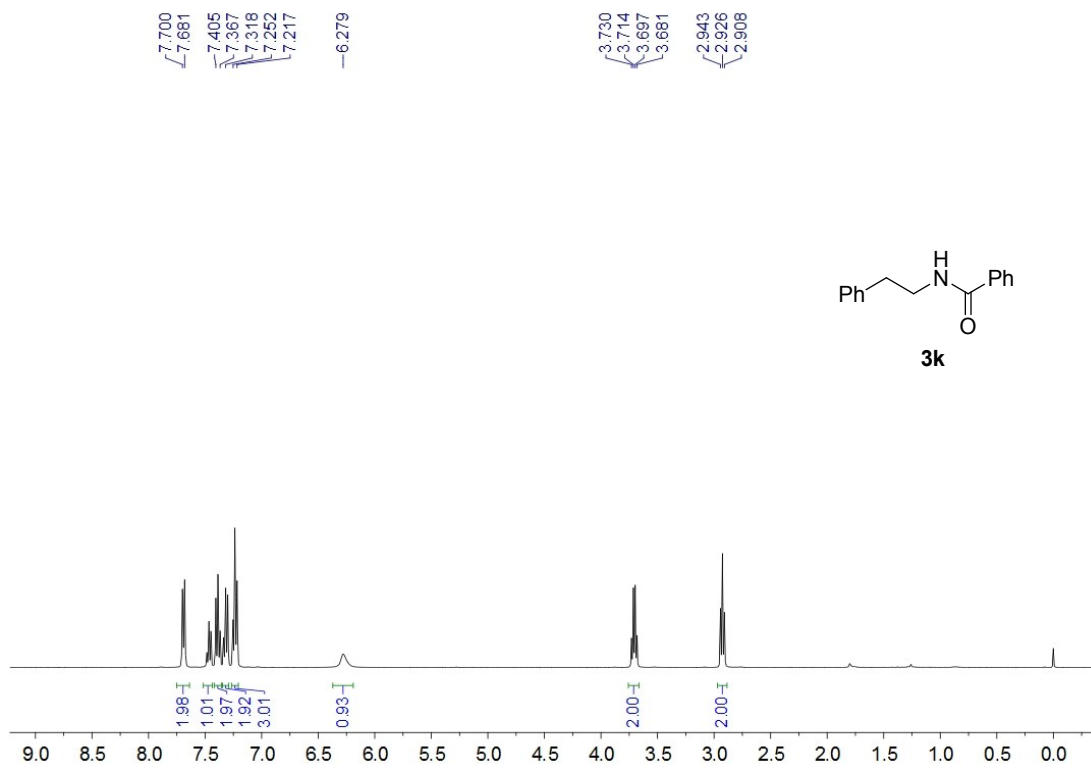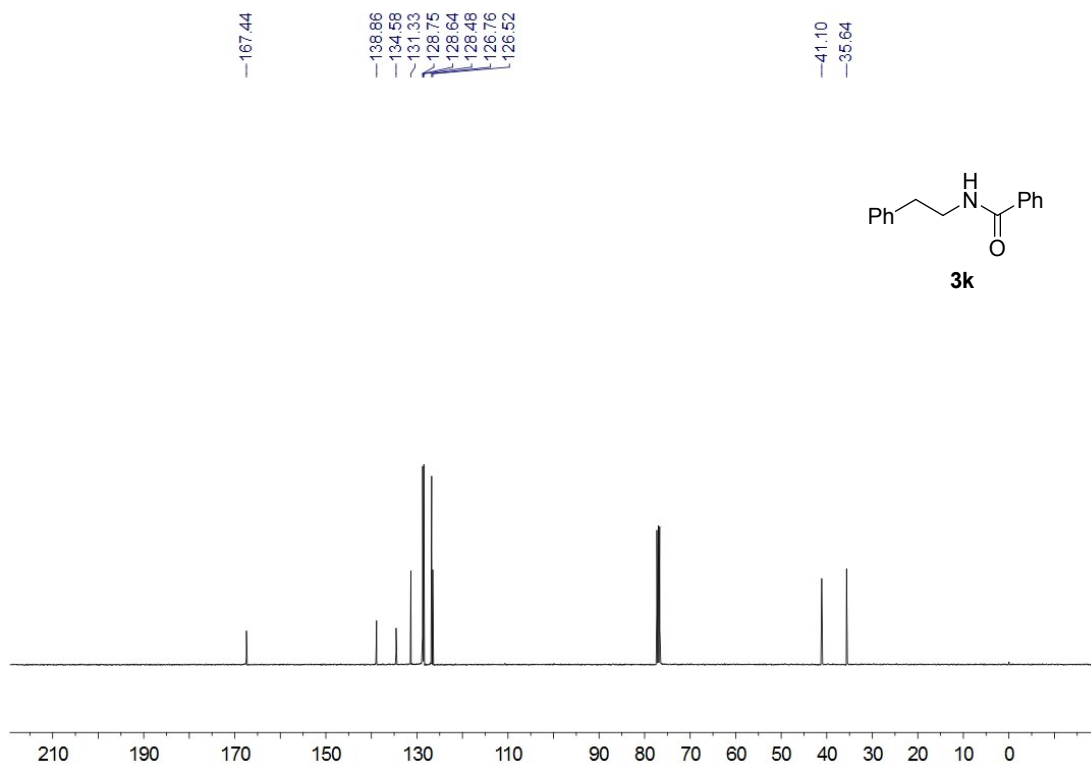

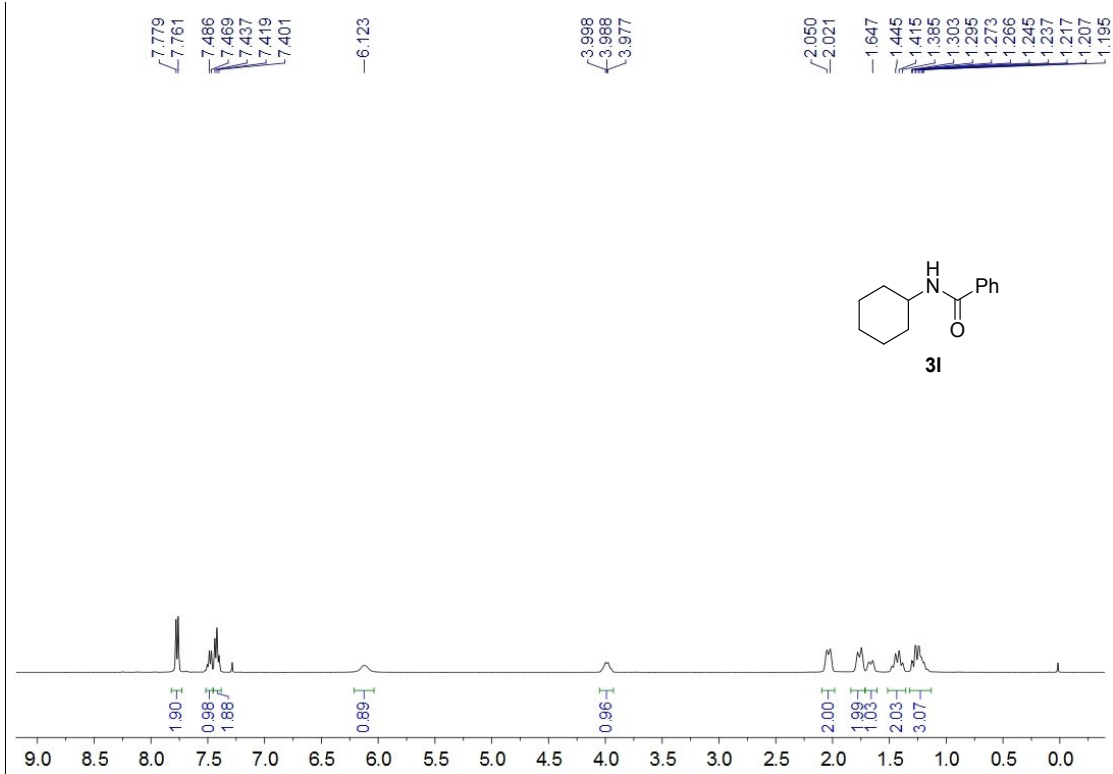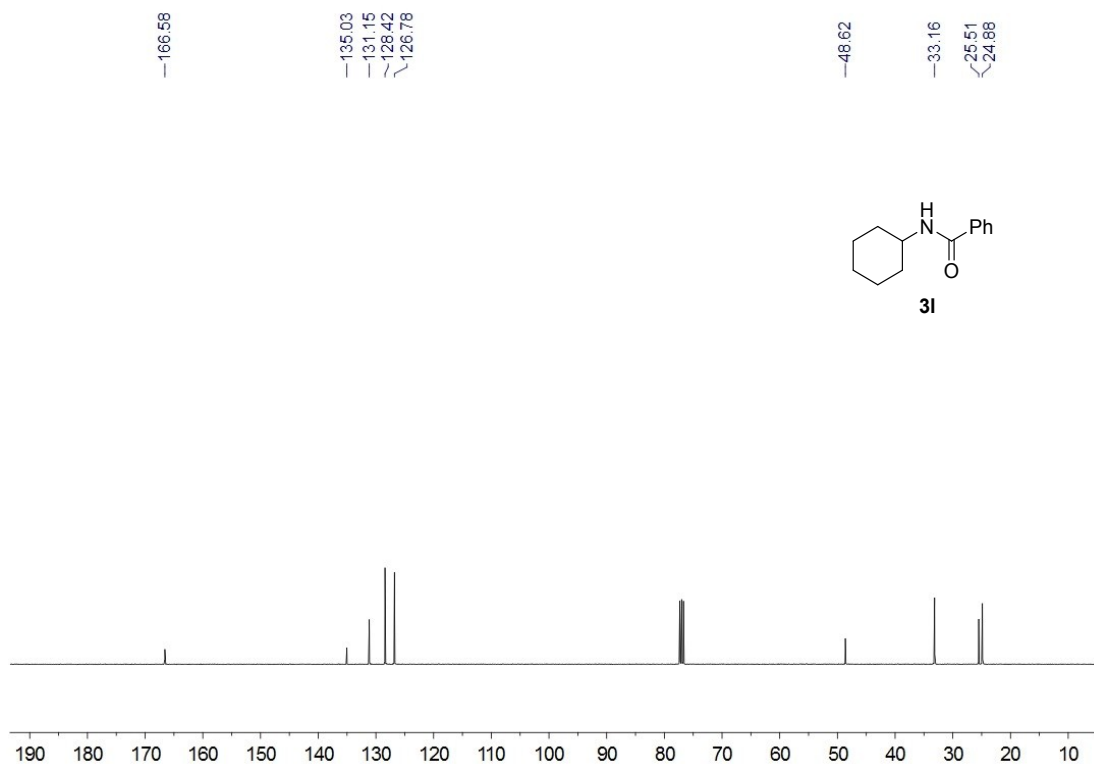

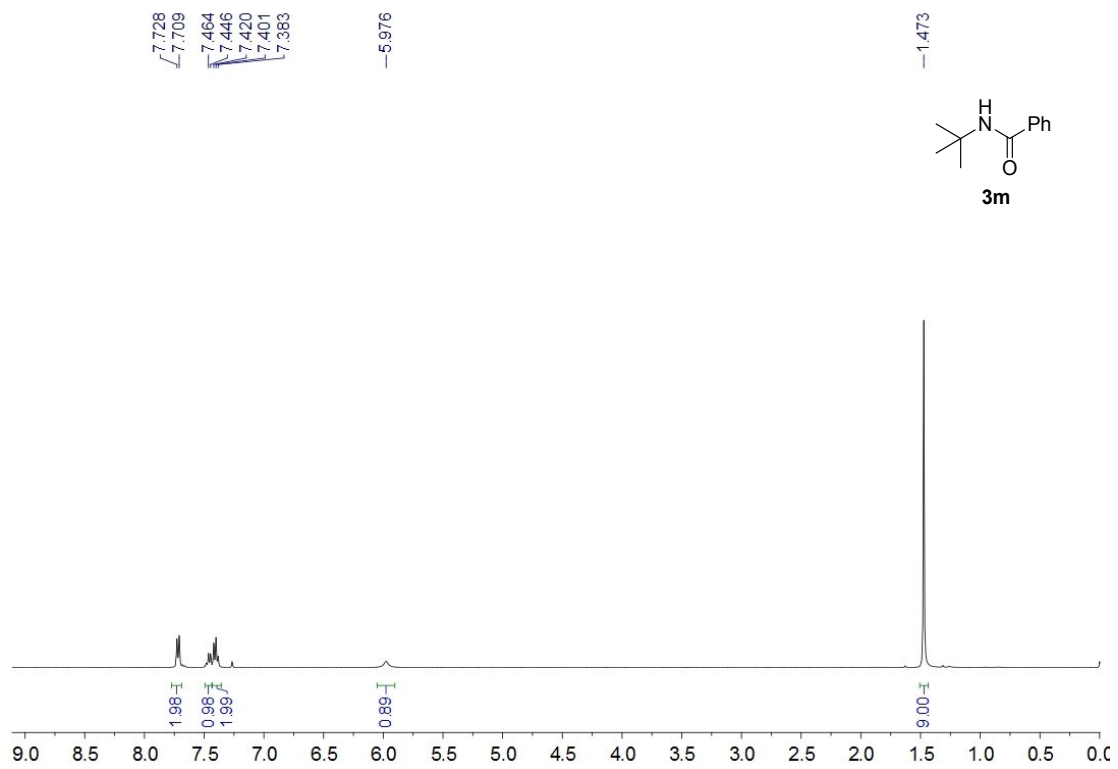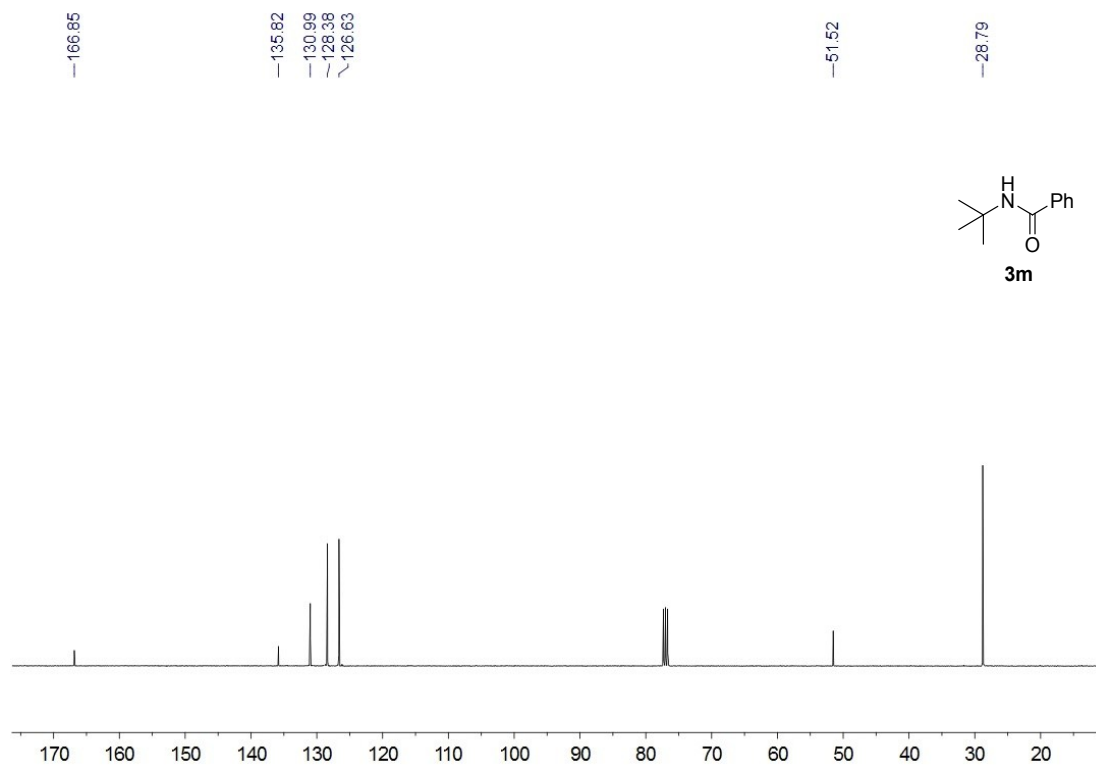

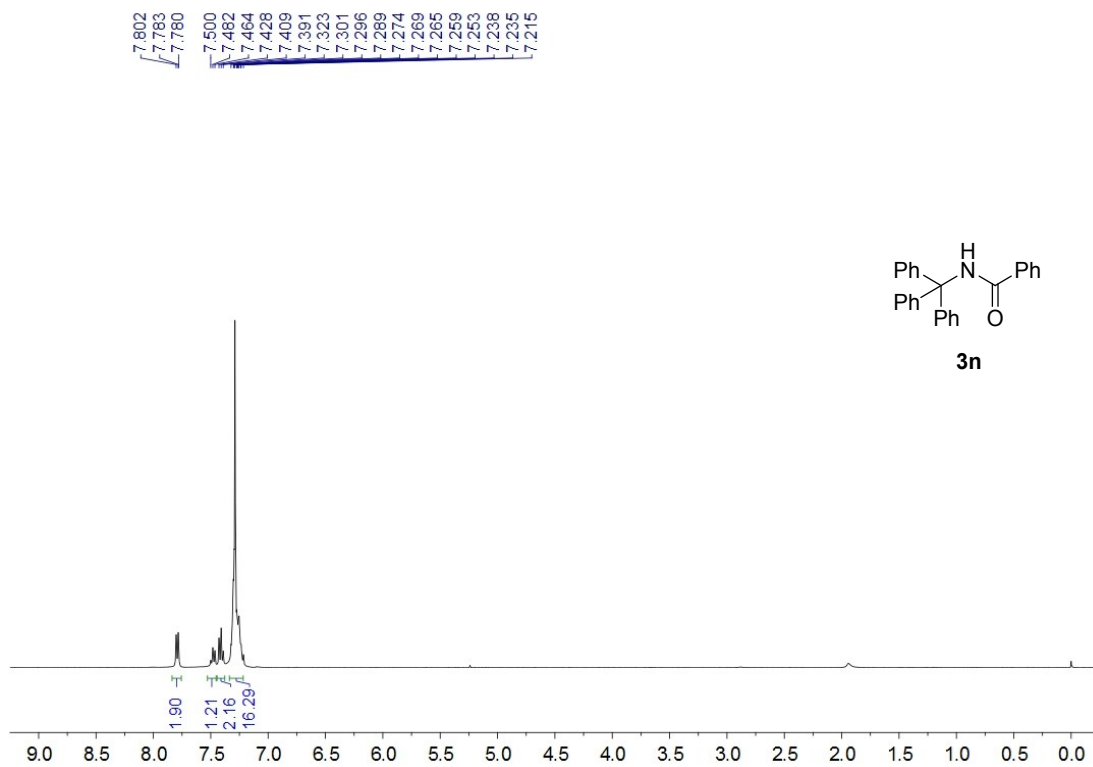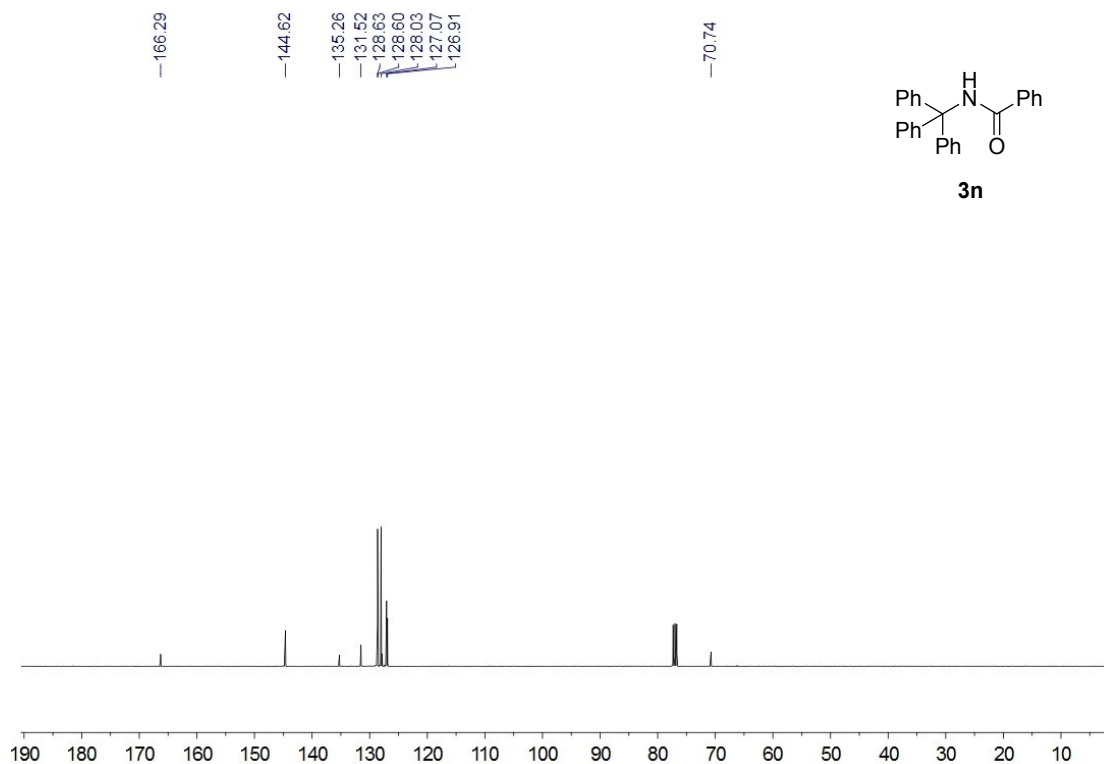

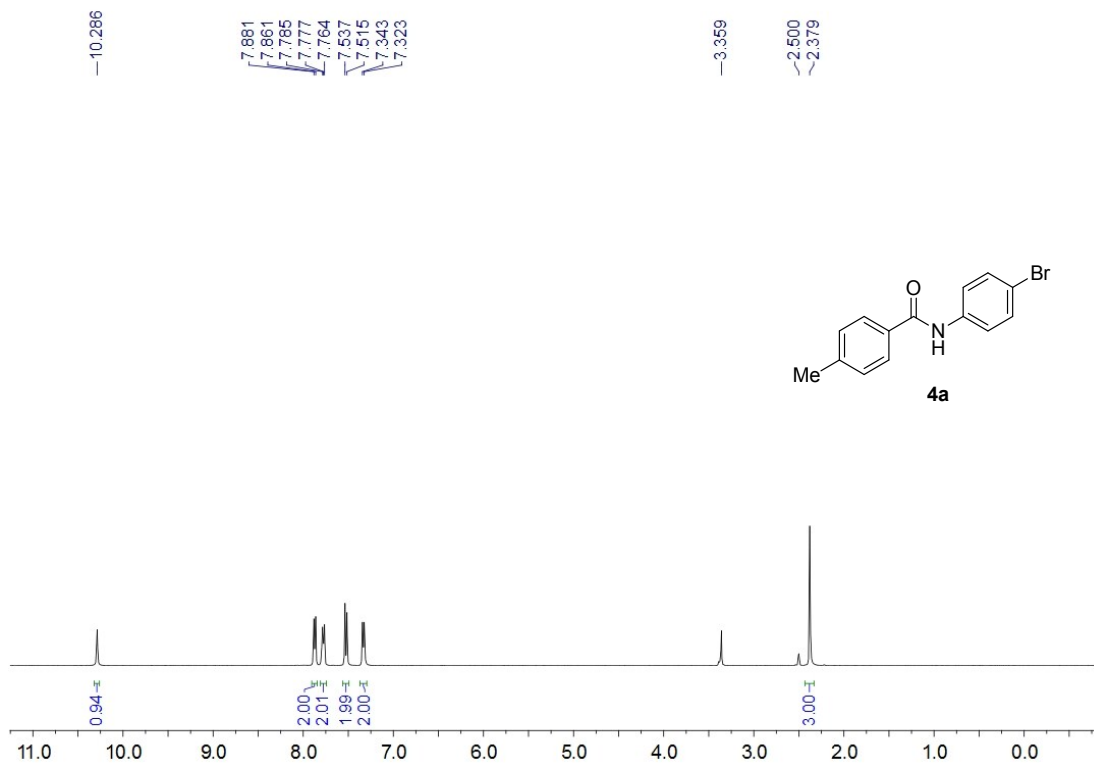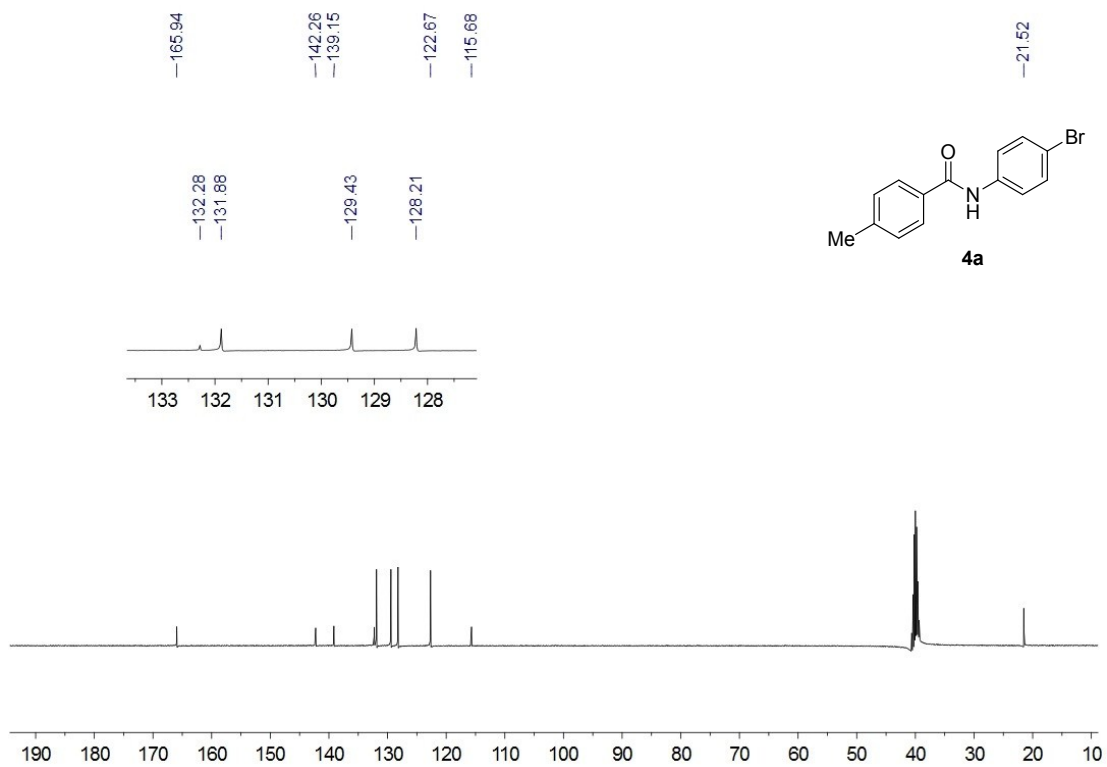

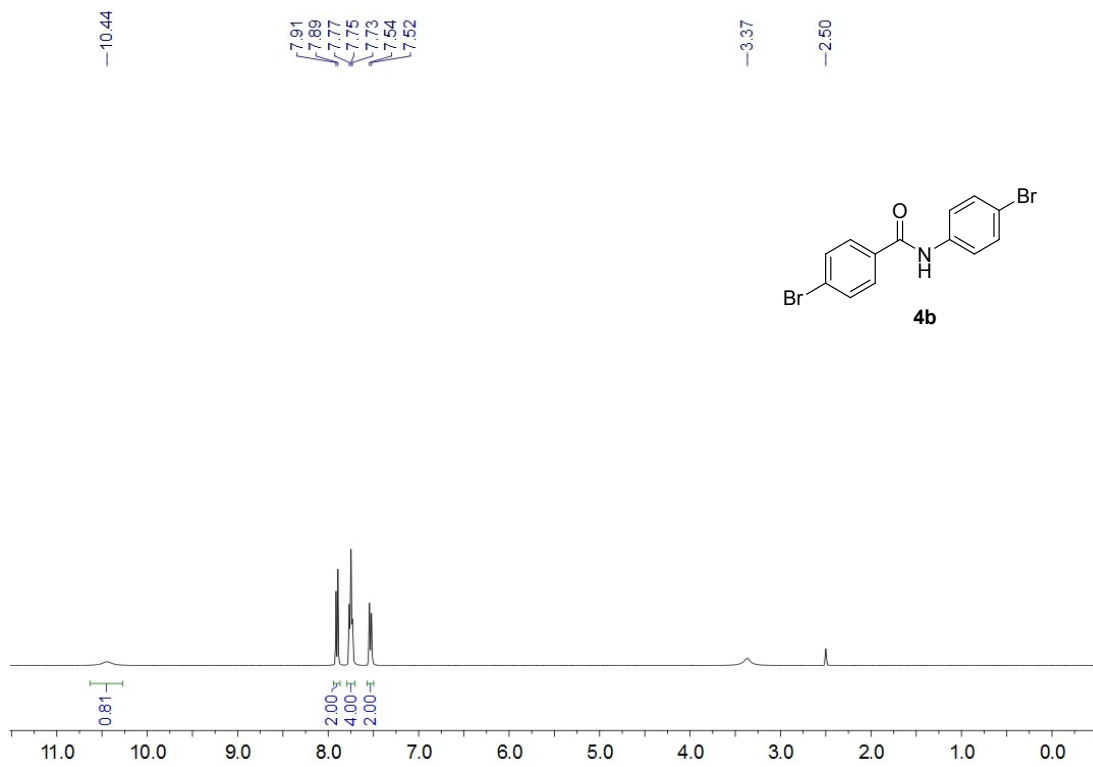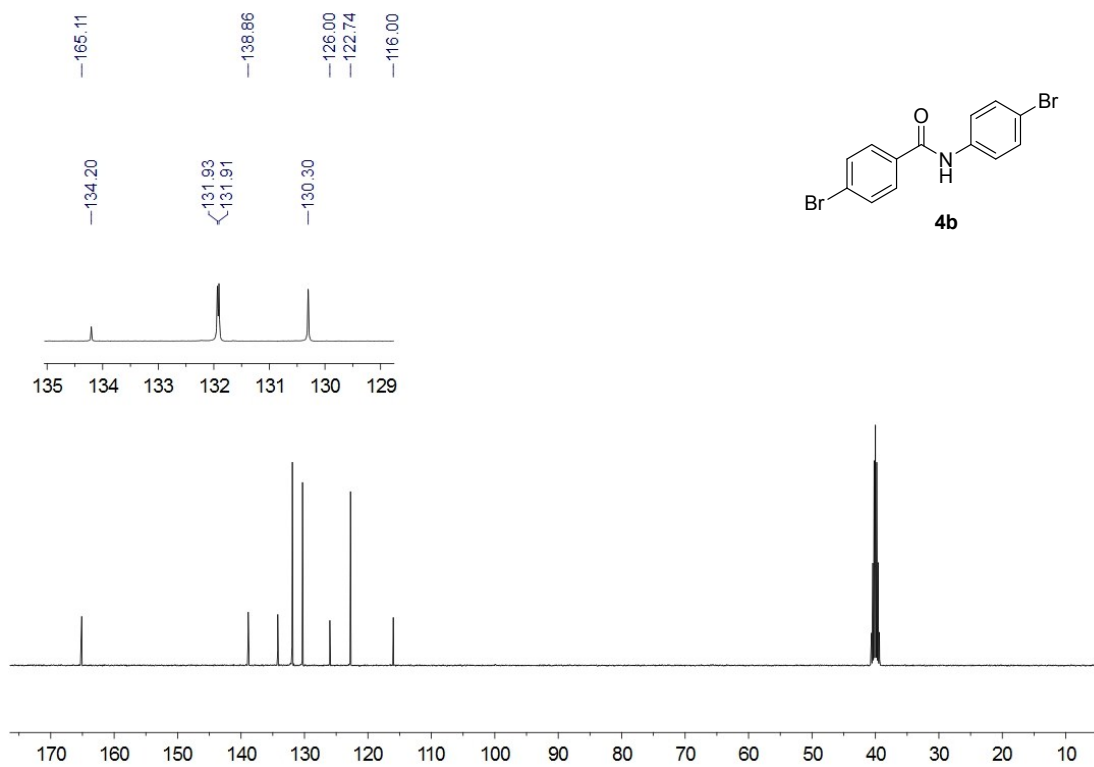



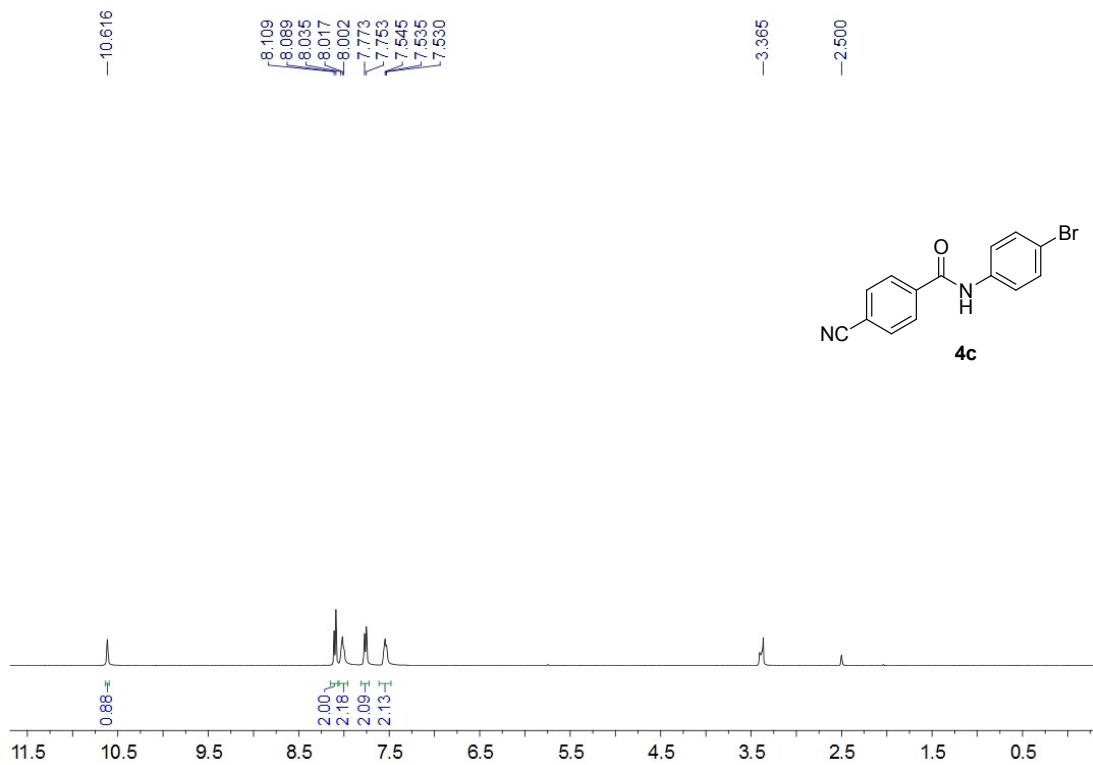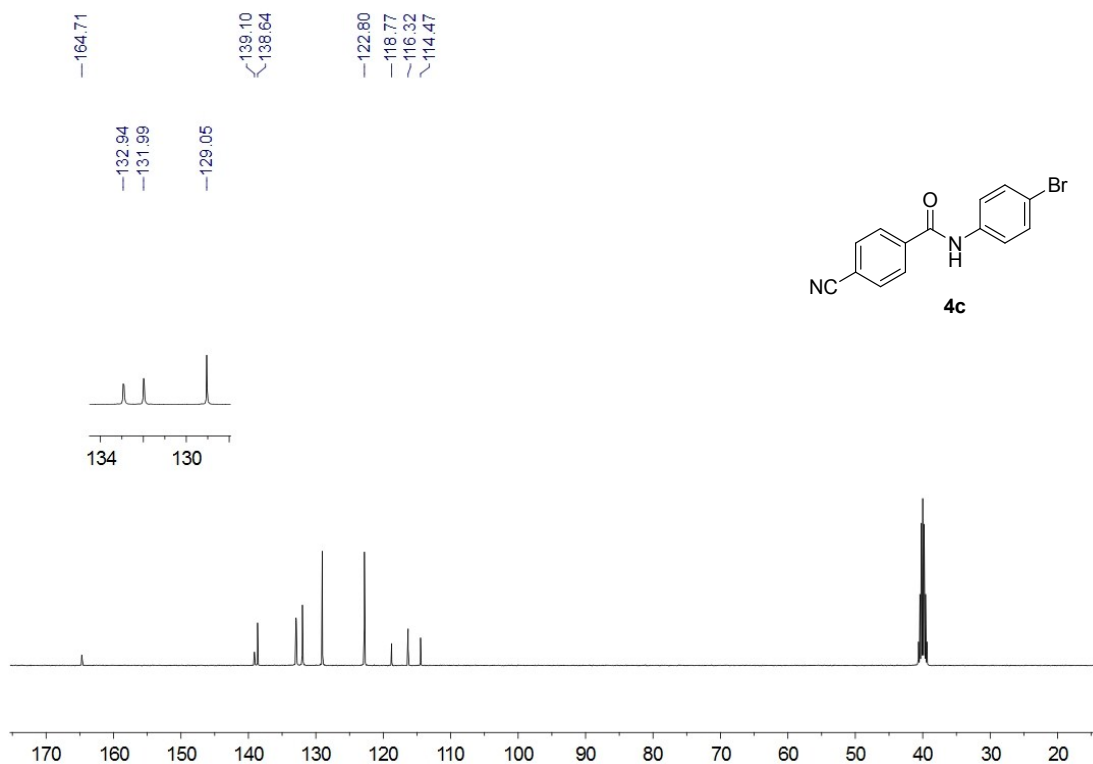

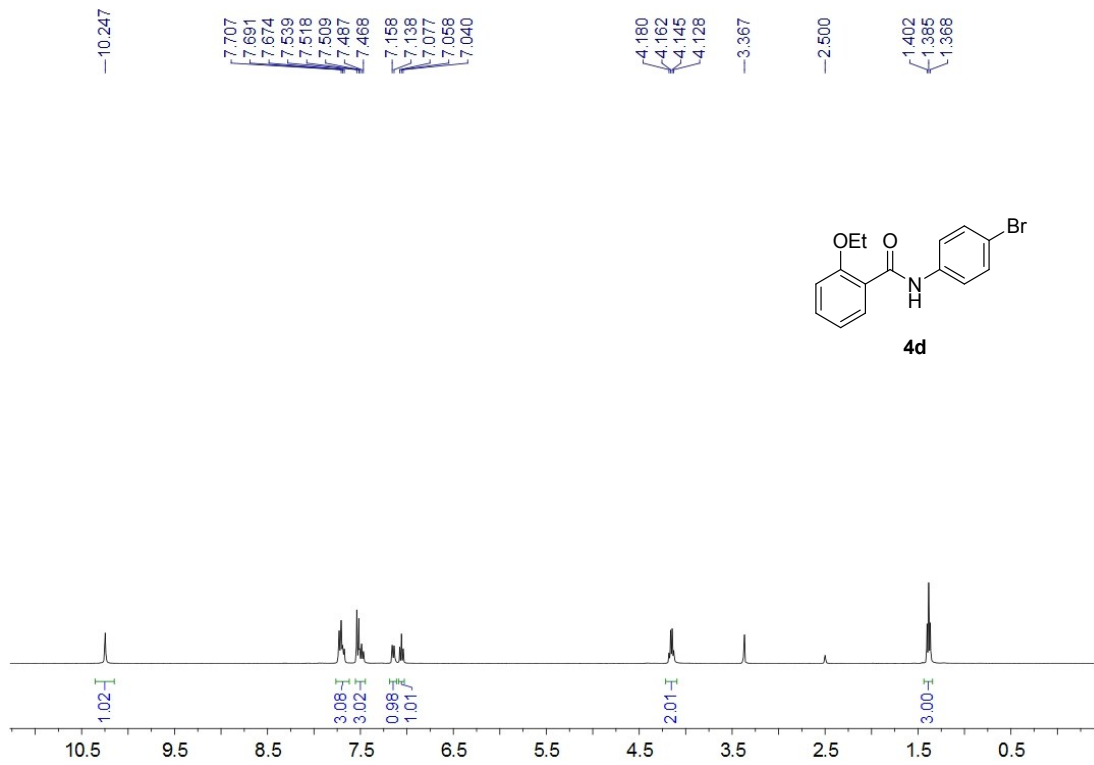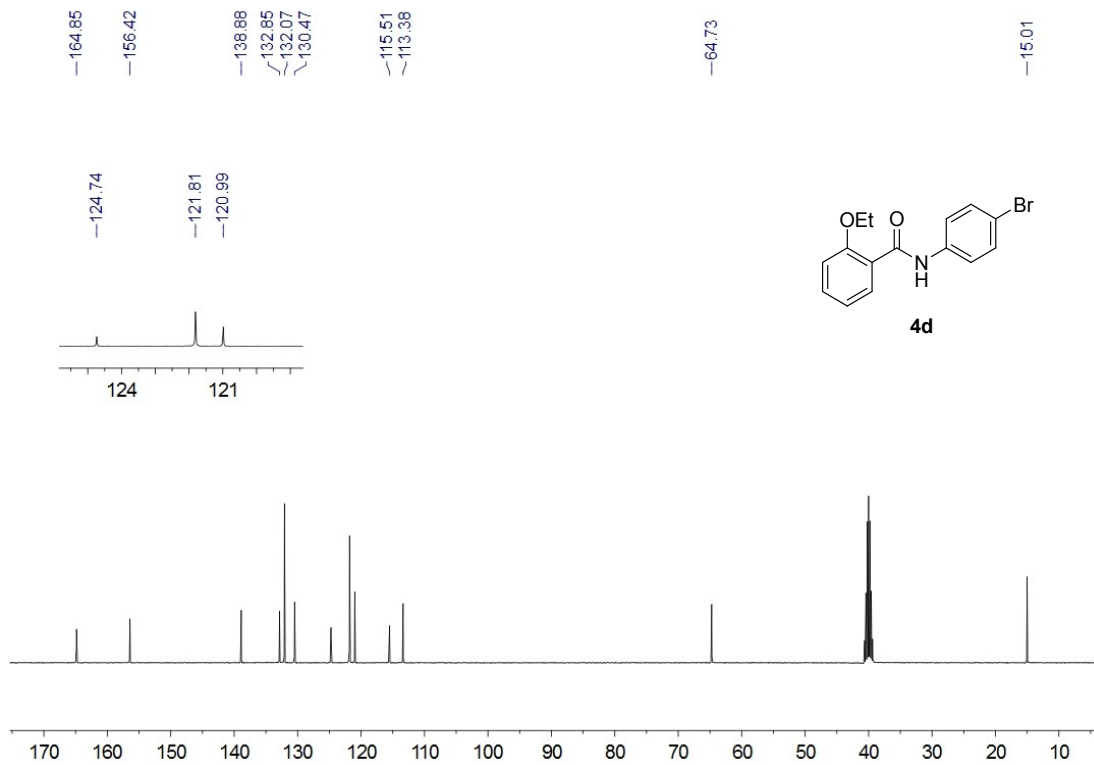

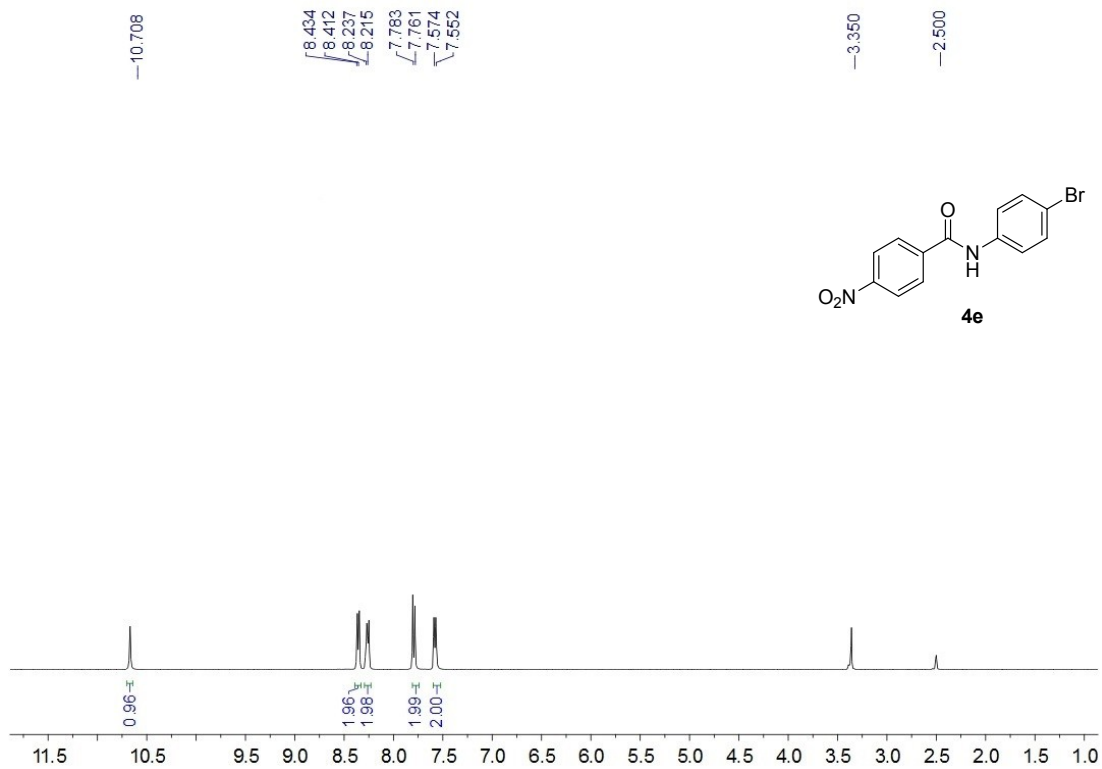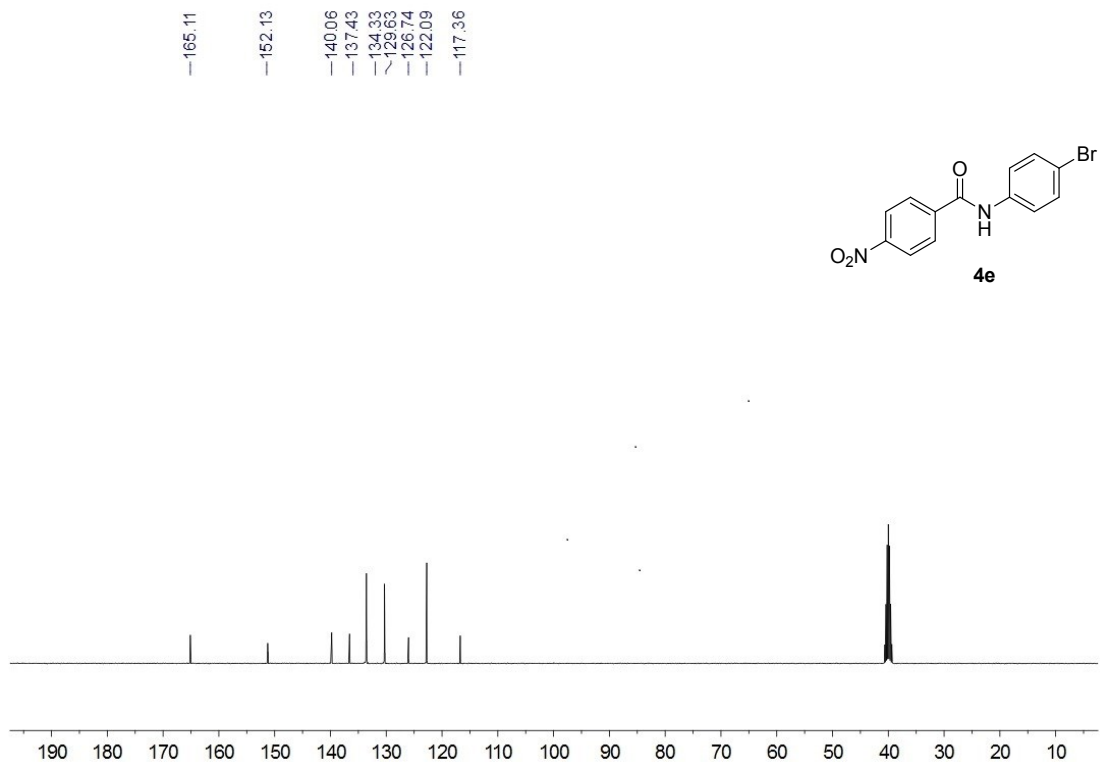

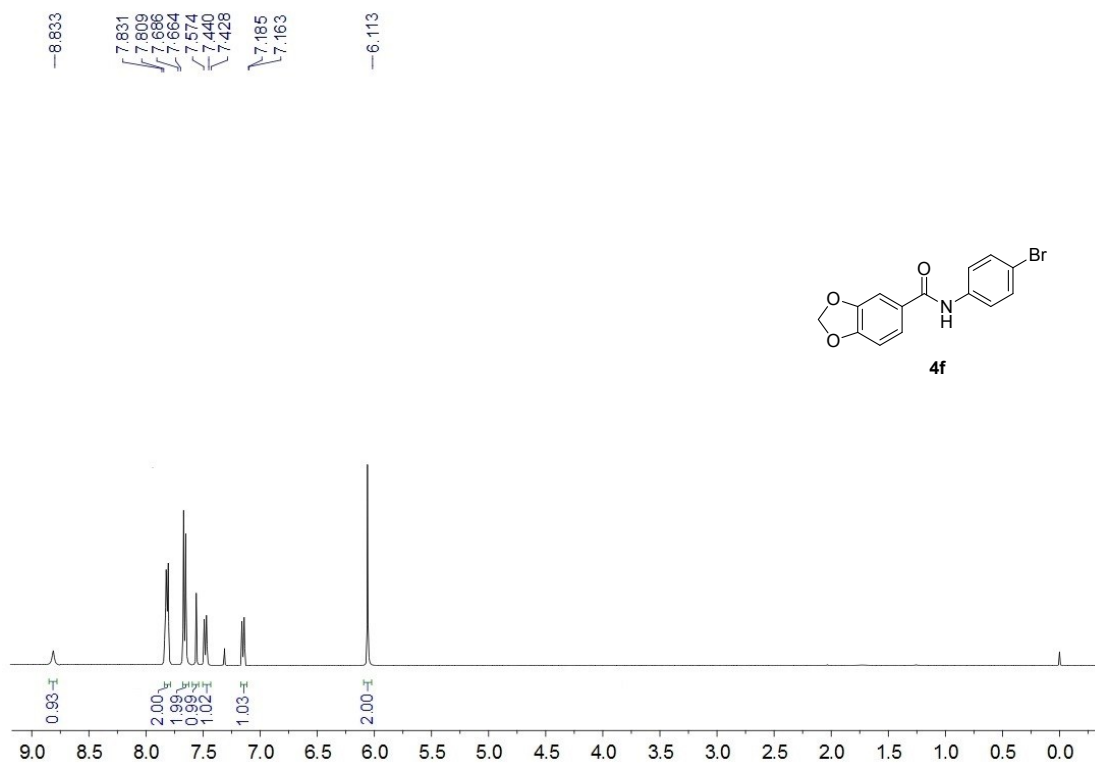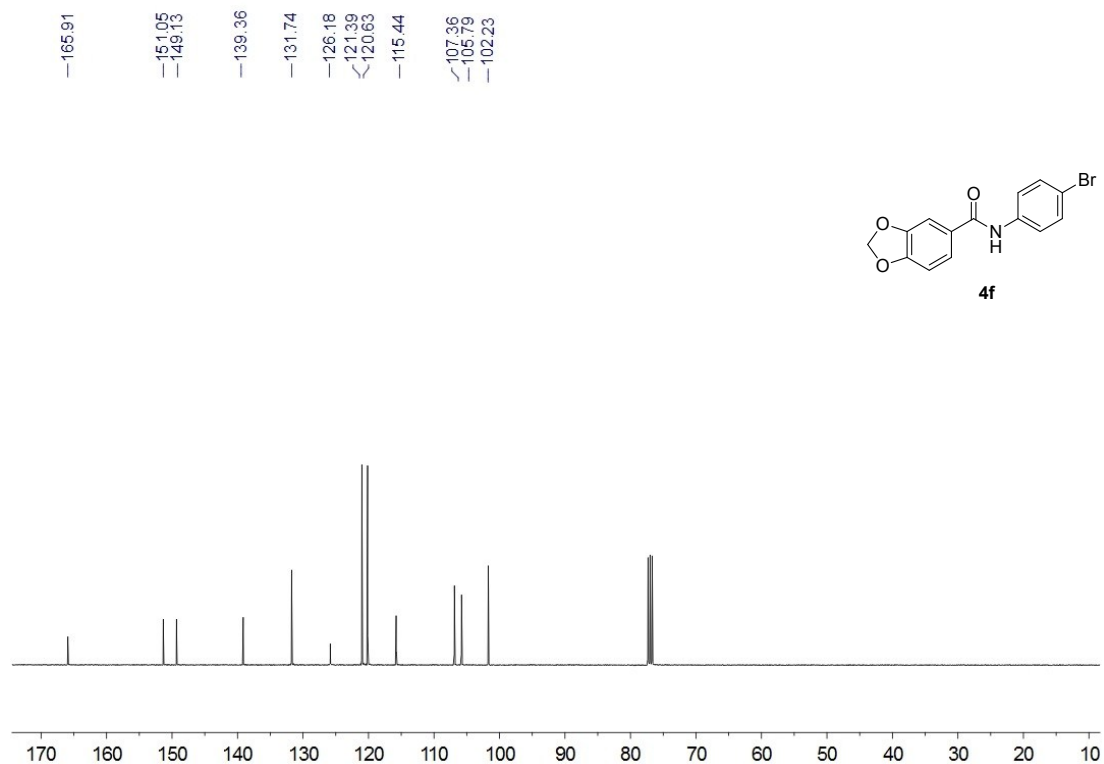

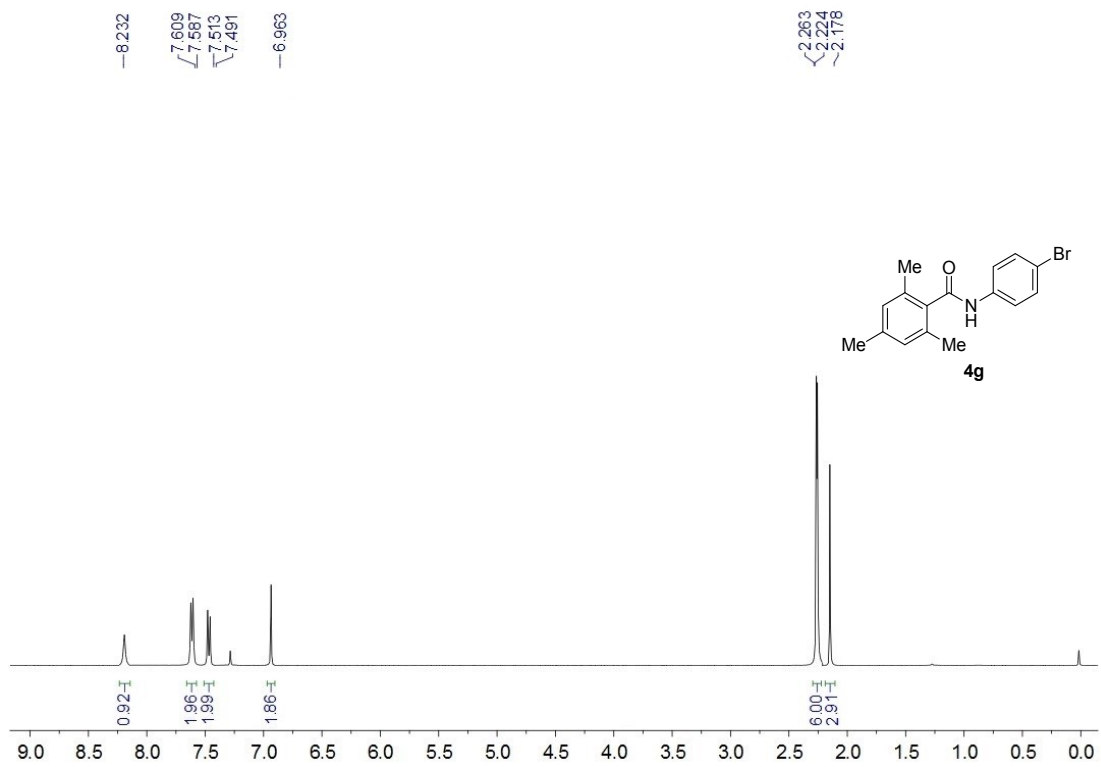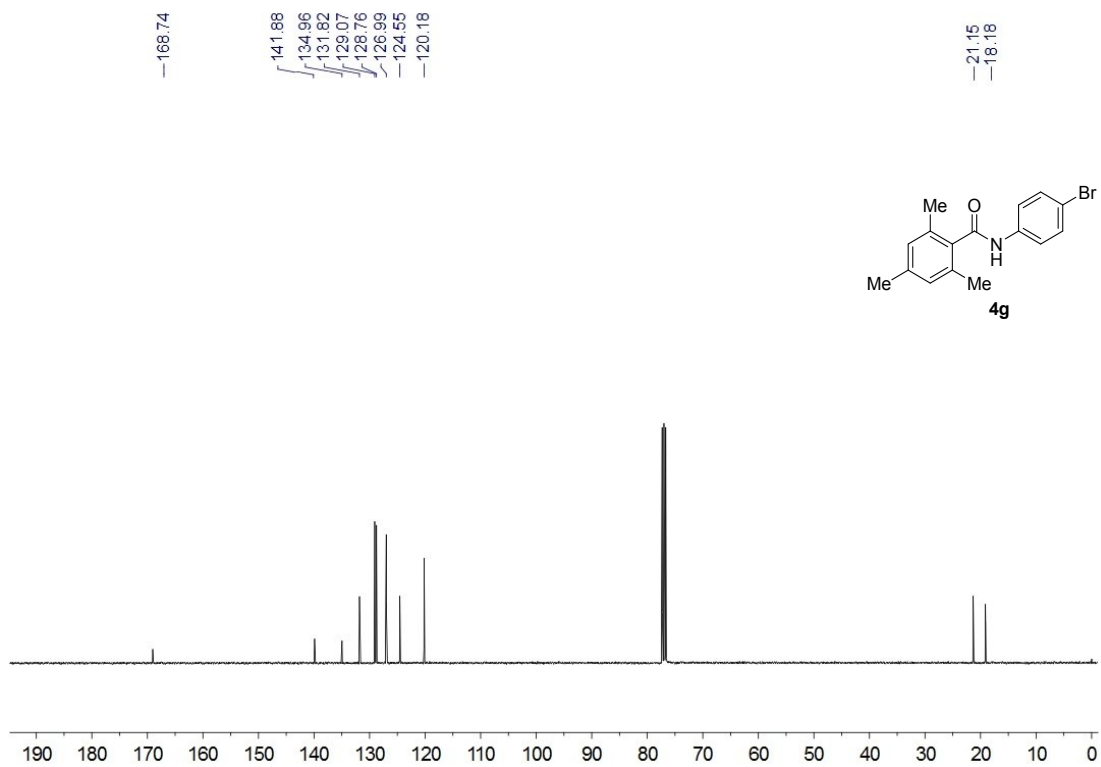

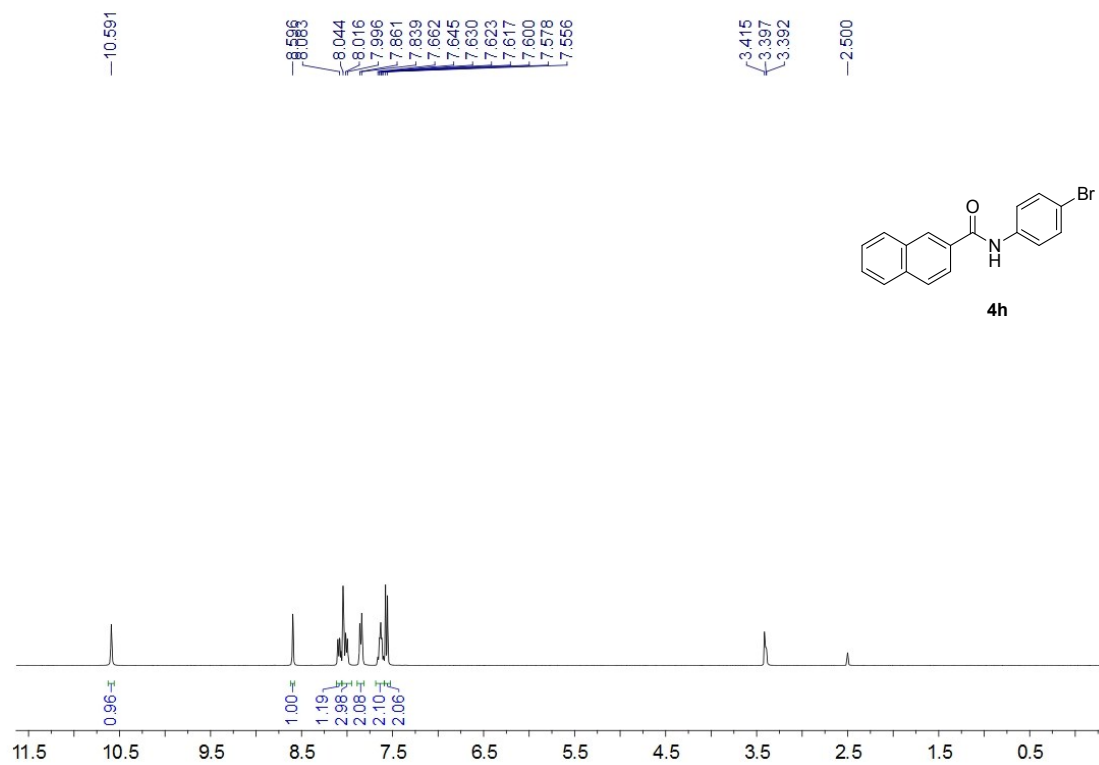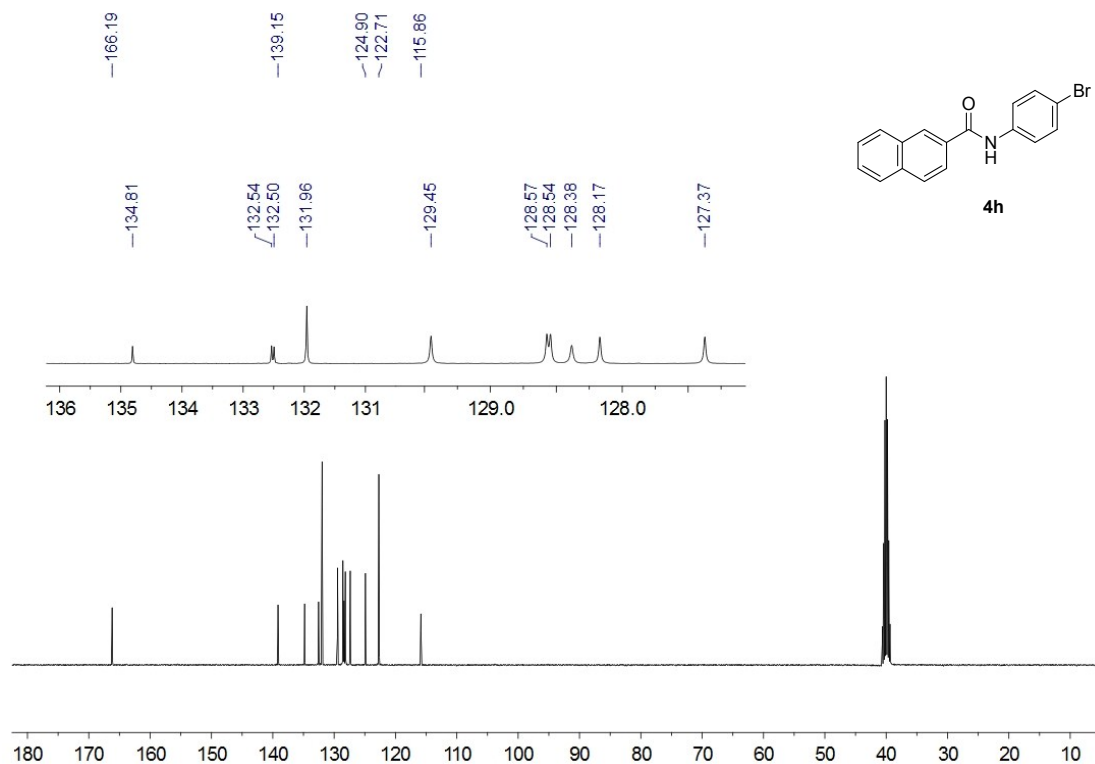

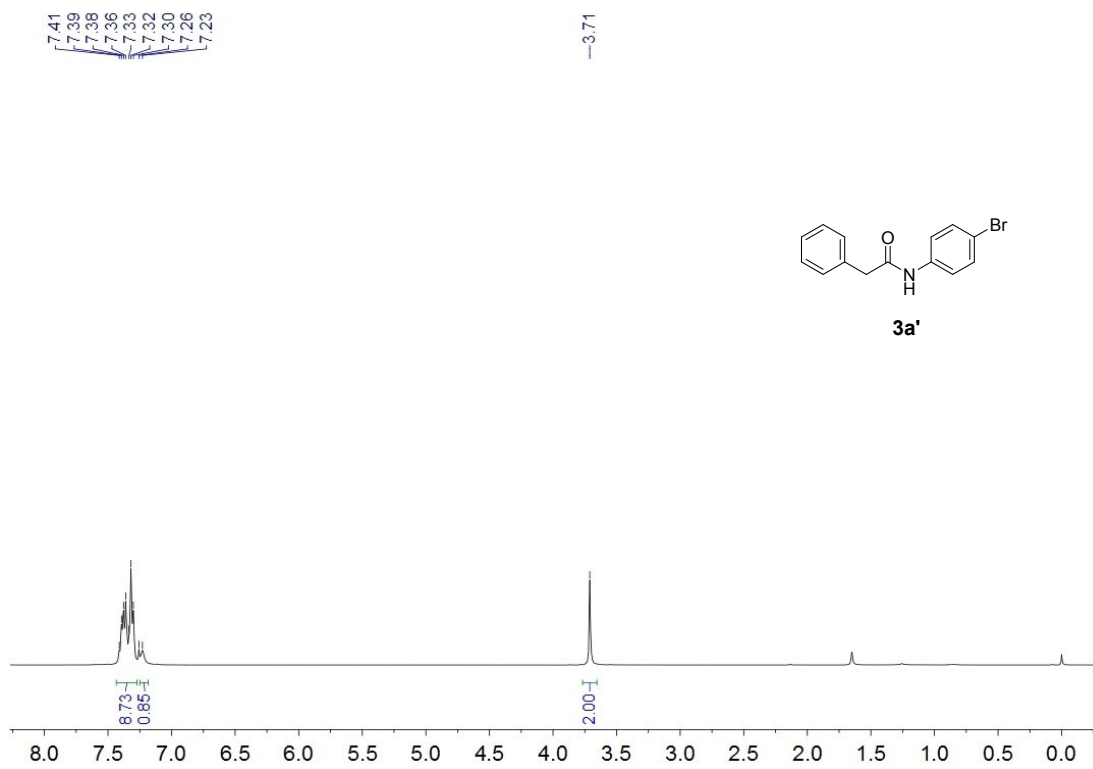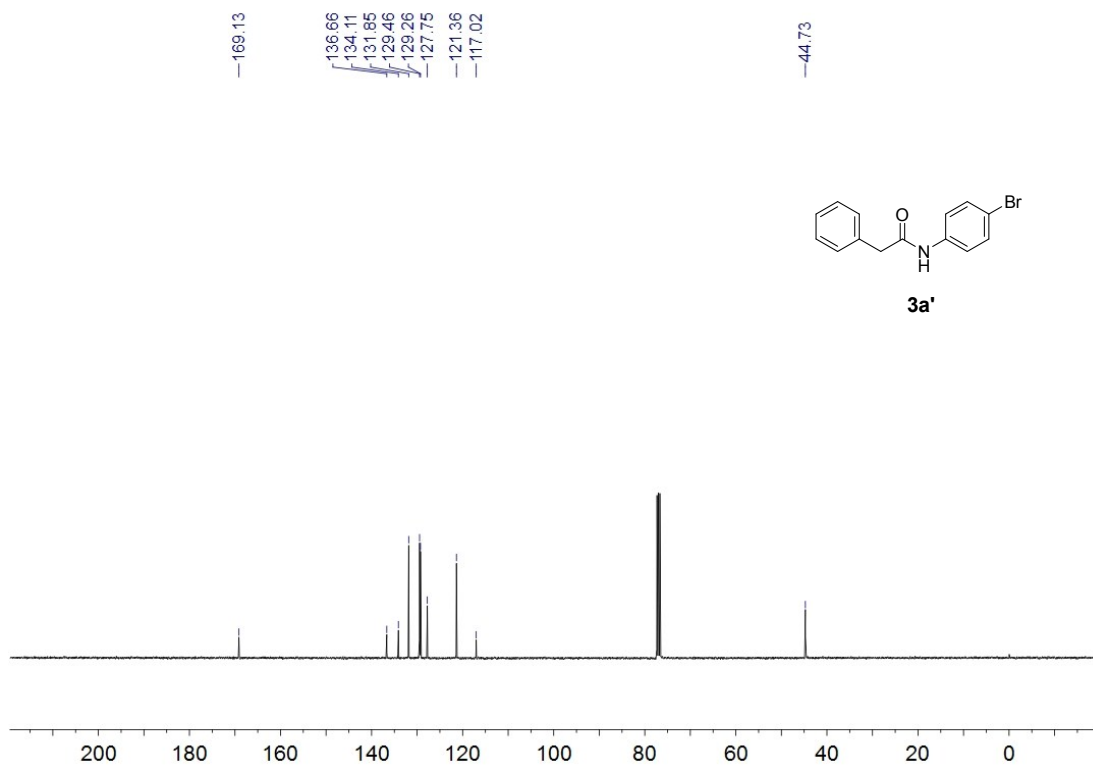

Supplement: c7ob01449j1.pdf [file c7ob01449j1.pdf]
